# Supplementary material
Source: PubMed Central journal article supplement (PMC2997912)
Supplement: NIHMS249599-supplement-1_si_001.pdf [file NIHMS249599-supplement-1_si_001.pdf]

## Supporting Information

### Structural Determinants for Transport Across the Intestinal Bile Acid Transporter Using C-24 Bile Acid Conjugates

Rana Rais<sup>†‡</sup>, Chayan Acharya<sup>†‡</sup>, Alexander D. MacKerell, Jr.<sup>‡\*</sup>, James E. Polli<sup>‡\*</sup>

<sup>†</sup>Contributed equally to the work

<sup>‡</sup>Department of Pharmaceutical Sciences, School of Pharmacy, University of Maryland, 20 Penn Street, Baltimore, MD 21201

<sup>\*</sup>Department of Pharmaceutical Sciences, School of Pharmacy, University of Maryland, 20 Penn Street, HSF2 Room 623, Baltimore, MD 21201, Telephone: 410-706-8292, Fax : 410-706-5017      E-mail : [jpolli@rx.umaryland.edu](mailto:jpolli@rx.umaryland.edu)

<sup>\*</sup>Department of Pharmaceutical Sciences, School of Pharmacy, University of Maryland, 20 Penn Street, HSF2 Room 629, Baltimore, MD 21201, Telephone: 410-706-7442, Fax : 410-706-5017      E-mail : [amackere@rx.umaryland.edu](mailto:amackere@rx.umaryland.edu)

| <u>Table of Contents</u>                                                                                        | <u>page</u> |
|-----------------------------------------------------------------------------------------------------------------|-------------|
| <b>Table S1a.</b> Multiple reaction monitoring (MRM)                                                            | 3           |
| <b>Table S1b.</b> Stereochemical SMILES of the compounds used in this study.                                    | 5           |
| <b>Table S2.</b> Correlation matrix between descriptors for aniline conjugates                                  | 8           |
| <b>Table S3.</b> Values of structural and physico-chemical descriptors                                          | 14          |
| <b>Table S4.</b> Results from single-variable regression for $K_m$ for <b>Set 1</b> .                           | 20          |
| <b>Table S5.</b> Results from single-variable regression for $K_m$ for <b>Set 2</b> .                           | 22          |
| <b>Table S6.</b> Results from single-variable regression for $K_m/\text{norm}V_{\text{max}}$ for <b>Set 1</b> . | 24          |
| <b>Table S7.</b> Results from single-variable regression for $K_m/\text{norm}V_{\text{max}}$ for <b>Set 2</b> . | 26          |
| <b>Table S8.</b> Observed and predicted $K_m$ values.                                                           | 28          |
| <b>Table S9.</b> Observed and predicted $K_m/\text{norm}V_{\text{max}}$ values.                                 | 32          |
| <b>Table S10.</b> CSP-SAR multivariable regression for $\log(K_m)$ for <b>Set 1</b> .                           | 36          |
| <b>Table S11.</b> CSP-SAR multivariable regression for $\log(K_m)$ for <b>Set 2</b> .                           | 36          |
| <b>Table S12.</b> CSP-SAR multivariable regression for $\log(K_m/\text{norm}V_{\text{max}})$ for <b>Set 1</b> . | 37          |
| <b>Table S13.</b> CSP-SAR multivariable regression for $\log(K_m/\text{norm}V_{\text{max}})$ for <b>Set 2</b> . | 37          |
| <b>Table S14.</b> CSP-SAR multivariable regression for $\log(\text{norm}V_{\text{max}}/K_m)$ for <b>Set 1</b> . | 38          |
| <b>Table S15.</b> CSP-SAR multivariable regression for $\log(\text{norm}V_{\text{max}}/K_m)$ for <b>Set 2</b> . | 38          |
| <b>Figure S1.</b> Probability distributions of structural descriptors.                                          | 39          |
| <b>Figure S2.</b> Regression plots of predicted vs. observed $\log(K_m)$ values.                                | 40          |
| <b>Figure S2.</b> Regression plots of predicted vs. observed $\log(K_m/\text{norm}V_{\text{max}})$ values.      | 41          |

**Table S1a.** Multiple reaction monitoring (MRM) transitions for conjugates **1-32**.

| <b>Compound #</b> | <b>Q1 Mass (amu)</b> | <b>Q3 Mass (amu)</b> | <b>Starting Gradient (A:B)</b> | <b>Run time (min)</b> |
|-------------------|----------------------|----------------------|--------------------------------|-----------------------|
| <b>1</b>          | 597.4                | 339.05               | 50:50                          | 6                     |
| <b>2</b>          | 631.3                | 238.95               | 50:50                          | 6                     |
| <b>3</b>          | 665.4                | 290.95               | 50:50                          | 6                     |
| <b>4</b>          | 615.2                | 321.16               | 55:45                          | 6                     |
| <b>5</b>          | 615.4                | 339.10               | 55:45                          | 6                     |
| <b>6</b>          | 615.4                | 339.39               | 55:45                          | 6                     |
| <b>7</b>          | 611.4                | 218.7                | 55:45                          | 8                     |
| <b>8</b>          | 611.4                | 107.98               | 55:45                          | 8                     |
| <b>9</b>          | 611.5                | 219.23               | 55:45                          | 8                     |
| <b>10</b>         | 627.2                | 235.50               | 50:50                          | 6                     |
| <b>11</b>         | 627.1                | 123.89               | 50:50                          | 6                     |
| <b>12</b>         | 627.3                | 123.65               | 50:50                          | 6                     |
| <b>13</b>         | 653.4                | 261.14               | 50:50                          | 8                     |
| <b>14</b>         | 655.3                | 152.01               | 50:50                          | 6                     |
| <b>15</b>         | 669.3                | 119.79               | 50:50                          | 8                     |
| <b>16</b>         | 669.4                | 276.81               | 50:50                          | 8                     |
| <b>17</b>         | 712.8                | 153.36, 620.29       | 50:50                          | 8                     |
| <b>18</b>         | 712.2                | 637.94               | 50:50                          | 8                     |
| <b>19</b>         | 612.5                | 219.97               | 70:30                          | 8                     |
| <b>20</b>         | 612.1                | 108.95               | 70:30                          | 8                     |
| <b>21</b>         | 612.5                | 108.59, 174.69       | 70:30                          | 8                     |
| <b>22</b>         | 633.2                | 130.05               | 50:50                          | 6                     |
| <b>23</b>         | 625.39               | 121.83               | 50:50                          | 6                     |
| <b>24</b>         | 625.5                | 121.85               | 50:50                          | 6                     |
| <b>25</b>         | 657.3                | 153.95               | 50:50                          | 6                     |

|           |        |               |       |     |
|-----------|--------|---------------|-------|-----|
| <b>26</b> | 732.1  | 90.53, 340.49 | 55:45 | 7   |
| <b>27</b> | 641.9  | 339.90        | 55:45 | 8   |
| <b>28</b> | 641.3  | 249.96        | 55:45 | 8   |
| <b>29</b> | 655.51 | 134.70        | 55:45 | 8   |
| <b>30</b> | 694.3  | 90.66         | 70:30 | 8.5 |
| <b>31</b> | 618.2  | 581.98        | 70:30 | 8.5 |
| <b>32</b> | 694.4  | 173.70        | 70:30 | 8.5 |

The mobile phase for all compounds **1-29** comprised of: A;HPLC grade water with 0.1% formic, B; HPLC grade acetonitrile with 0.1% formic acid. For compounds **30-32** 0.1% ammonium hydroxide was used as a modifier. Following gradient was used for most compounds.





25 ] [H] [C@@]1 ([H]) [C@]3 ([H]) C ([H]) ( [H] ) C ([H]) ( [H] ) [C@] ([H]) ( [C@] ([H]) ( [C] ([H]) ( [H] ) [H] ) C ([H]) ( [H] ) C ([H]) ( [H] ) [C+] (= [O-] ) [N-] ( [H] ) [C@] ([H]) ( [c+] (: [o-] ) : [o-] ) C ([H]) ( [H] ) C ([H]) ( [H] ) [C+] (= [O-] ) [N-] ( [H] ) c4c ([H]) c ([H]) c ([H]) c ([H]) c4C ([H]) ( [H] ) [H] ) C ([H]) ( [H] ) [H] ) [C@@]3 C ([H]) ( [H] ) [H] ) C ([H]) ( [H] ) C ([H]) ( [H] ) [C@]21 [H] [H] [O-] [C@]1 ([H]) C ([H]) ( [H] ) C ([H]) ( [H] ) [C@]2 C ([H]) ( [H] ) [H] ) [C@@] ([H]) ( [C]1 ([H]) [H] ) C ([H]) ( [H] ) [C@@] ([H]) ( [O-] ) [H] ) [C@@]1 ([H]) [C@]3 ([H]) C ([H]) ( [H] ) C ([H]) ( [H] ) [C@] ([H]) ( [C@] ([H]) ( [C] ([H]) ( [H] ) [H] ) C ([H]) ( [H] ) C ([H]) ( [H] ) [C+] (= [O-] ) [N-] ) ( [H] ) [C@] ( [H] ) ( [c+] (: [o-] ) : [o-] ) C ([H]) ( [H] ) C ([H]) ( [H] ) [C+] (= [O-] ) [N-] ( [H] ) c4c ([H]) c ( OC ([H]) ( [H] ) [H] ) c ([H]) c ( OC ([H]) ( [H] ) [H] ) c4 [H] ) [C@@]3 C ([H]) ( [H] ) [H] ) C ([H]) ( [H] ) C ([H]) ( [H] ) [C@]21 [H]

26 [H] [O-] [C@]1 ([H]) C ([H]) ( [H] ) C ([H]) ( [H] ) [C@@]2 C ([H]) ( [H] ) [H] ) [C@@] ([H]) ( [C]1 ([H]) [H] ) C ([H]) ( [H] ) [C@@] ([H]) ( [O-] ) [H] ) [C@@]1 ([H]) [C@]3 ([H]) C ([H]) ( [H] ) C ([H]) ( [H] ) [C@] ([H]) ( [C@] ([H]) ( [C] ([H]) ( [H] ) [H] ) C ([H]) ( [H] ) C ([H]) ( [H] ) [C+] (= [O-] ) [N-] ) ( [H] ) [C@] ( [H] ) ( [C+] (= [O-] ) OC ([H]) ( [H] ) c4c ([H]) c ([H]) c ([H]) c ([H]) c4 [H] ) C ([H]) ( [H] ) C ([H]) ( [H] ) [C+] (= [O-] ) [N-] ( [H] ) c4c ([H]) c ([H]) c ([H]) c4 [H] ) - [c+] (: [o-] ) : [o-] ) [C@@]3 C ([H]) ( [H] ) [H] ) C ([H]) ( [H] ) C ([H]) ( [H] ) [C@]21 [H]

27 [H] [O-] [C@]1 ([H]) C ([H]) ( [H] ) C ([H]) ( [H] ) [C@@]2 C ([H]) ( [H] ) [H] ) [C@@] ([H]) ( [C]1 ([H]) [H] ) C ([H]) ( [H] ) [C@@] ([H]) ( [O-] ) [H] ) [C@@]1 ([H]) [C@]3 ([H]) C ([H]) ( [H] ) C ([H]) ( [H] ) [C@] ([H]) ( [C@] ([H]) ( [C] ([H]) ( [H] ) [H] ) C ([H]) ( [H] ) C ([H]) ( [H] ) [C+] (= [O-] ) [N-] ) ( [H] ) [C@] ( [H] ) ( [c+] (: [o-] ) : [o-] ) C ([H]) ( [H] ) C ([H]) ( [H] ) [C+] (= [O-] ) [N-] ( [H] ) c4c ([H]) c ([H]) c ([H]) c (c4 [H] ) - [c+] (: [o-] ) : [o-] ) [C@@]3 C ([H]) ( [H] ) [H] ) C ([H]) ( [H] ) C ([H]) ( [H] ) [C@]21 [H]

---

**Table S2.** Correlation matrix between descriptors for aniline conjugates of glu-CDCA. Units of  $\Delta G_w$  are kcal/mol. Units of molar reflectivity are  $\text{m}^3/\text{mol}$ . Units of area (e.g.  $\text{SASA}_{\text{side}}$ ) is  $\text{\AA}^2$ . Other descriptors are dimensionless.

|                       | $\Delta G_w$ | logP  | C19-GS-O3 | O7-AA-C18 | O7-C19-GS | C18-GS-O7 | O7-C18-GS | HA    | MW    | O7-AA-BC | O3-C19-GS | C19-GS <sub>min</sub> | O7-AA-GS | O3-GS <sub>min</sub> |
|-----------------------|--------------|-------|-----------|-----------|-----------|-----------|-----------|-------|-------|----------|-----------|-----------------------|----------|----------------------|
| $\Delta G_w$          | 1.00         |       |           |           |           |           |           |       |       |          |           |                       |          |                      |
| logP                  | 0.90         | 1.00  |           |           |           |           |           |       |       |          |           |                       |          |                      |
| C19-GS-O3             | 0.61         | 0.46  | 1.00      |           |           |           |           |       |       |          |           |                       |          |                      |
| O7-AA-C18             | 0.43         | 0.24  | 0.86      | 1.00      |           |           |           |       |       |          |           |                       |          |                      |
| O7-C19-GS             | 0.60         | 0.47  | 0.97      | 0.84      | 1.00      |           |           |       |       |          |           |                       |          |                      |
| C18-GS-O7             | 0.68         | 0.54  | 0.65      | 0.62      | 0.61      | 1.00      |           |       |       |          |           |                       |          |                      |
| O7-C18-GS             | 0.61         | 0.54  | 0.90      | 0.74      | 0.94      | 0.46      | 1.00      |       |       |          |           |                       |          |                      |
| HA                    | -0.40        | -0.36 | -0.12     | 0.07      | -0.08     | -0.13     | -0.10     | 1.00  |       |          |           |                       |          |                      |
| MW                    | -0.08        | 0.13  | -0.04     | -0.12     | 0.02      | 0.09      | 0.09      | 0.57  | 1.00  |          |           |                       |          |                      |
| O7-AA-BC              | 0.35         | 0.20  | 0.83      | 0.95      | 0.81      | 0.44      | 0.79      | 0.08  | -0.12 | 1.00     |           |                       |          |                      |
| O3-C19-GS             | 0.40         | 0.27  | 0.87      | 0.75      | 0.88      | 0.34      | 0.91      | -0.06 | -0.08 | 0.84     | 1.00      |                       |          |                      |
| C19-GS <sub>min</sub> | 0.51         | 0.34  | 0.84      | 0.86      | 0.85      | 0.80      | 0.73      | -0.03 | -0.01 | 0.77     | 0.70      | 1.00                  |          |                      |
| O7-AA-GS              | 0.57         | 0.45  | 0.95      | 0.83      | 0.94      | 0.77      | 0.85      | -0.06 | 0.10  | 0.76     | 0.79      | 0.92                  | 1.00     |                      |
| O3-GS <sub>min</sub>  | 0.52         | 0.36  | 0.91      | 0.86      | 0.91      | 0.77      | 0.79      | -0.04 | 0.00  | 0.78     | 0.78      | 0.97                  | 0.96     | 1.00                 |
| O3-C18-GS             | 0.54         | 0.45  | 0.96      | 0.82      | 0.96      | 0.59      | 0.94      | -0.08 | 0.05  | 0.81     | 0.89      | 0.83                  | 0.93     | 0.91                 |
| MR                    | -0.05        | 0.15  | 0.05      | -0.03     | 0.10      | 0.09      | 0.20      | 0.62  | 0.91  | 0.00     | 0.01      | 0.02                  | 0.15     | 0.05                 |
| C18-GS-O3             | 0.52         | 0.40  | 0.95      | 0.88      | 0.93      | 0.74      | 0.81      | 0.00  | 0.07  | 0.79     | 0.77      | 0.91                  | 0.97     | 0.96                 |
| AA-GS-O7              | 0.55         | 0.42  | 0.83      | 0.80      | 0.80      | 0.88      | 0.68      | -0.02 | 0.09  | 0.69     | 0.63      | 0.96                  | 0.93     | 0.95                 |
| O7-GS <sub>min</sub>  | 0.53         | 0.39  | 0.91      | 0.83      | 0.90      | 0.78      | 0.80      | -0.06 | 0.03  | 0.75     | 0.76      | 0.96                  | 0.97     | 0.99                 |
| O7-AA-C20             | 0.39         | 0.31  | 0.82      | 0.84      | 0.83      | 0.31      | 0.89      | 0.06  | -0.03 | 0.94     | 0.89      | 0.68                  | 0.74     | 0.72                 |
| brotN                 | -0.09        | 0.03  | -0.01     | -0.03     | 0.05      | 0.10      | 0.07      | 0.69  | 0.90  | -0.05    | -0.06     | 0.01                  | 0.09     | 0.02                 |
| BC-GS <sub>min</sub>  | 0.51         | 0.36  | 0.83      | 0.80      | 0.85      | 0.78      | 0.73      | -0.05 | 0.03  | 0.71     | 0.68      | 0.99                  | 0.92     | 0.97                 |
| O3-AA-GS              | 0.51         | 0.39  | 0.92      | 0.85      | 0.91      | 0.78      | 0.81      | -0.02 | 0.11  | 0.77     | 0.75      | 0.96                  | 0.98     | 0.98                 |
| O7-GS                 | 0.52         | 0.40  | 0.90      | 0.83      | 0.90      | 0.79      | 0.81      | 0.00  | 0.12  | 0.76     | 0.76      | 0.96                  | 0.98     | 0.97                 |
| GS-O7-C18             | 0.49         | 0.40  | 0.93      | 0.83      | 0.97      | 0.53      | 0.96      | 0.02  | 0.11  | 0.85     | 0.91      | 0.85                  | 0.92     | 0.90                 |
| AA-GS-O3              | 0.51         | 0.35  | 0.77      | 0.78      | 0.76      | 0.89      | 0.61      | 0.02  | 0.11  | 0.65     | 0.54      | 0.95                  | 0.89     | 0.92                 |
| O3-GS                 | 0.50         | 0.37  | 0.91      | 0.85      | 0.91      | 0.77      | 0.81      | 0.03  | 0.13  | 0.77     | 0.77      | 0.96                  | 0.97     | 0.98                 |
| C18-GS <sub>min</sub> | 0.48         | 0.31  | 0.78      | 0.80      | 0.80      | 0.81      | 0.66      | 0.01  | 0.04  | 0.69     | 0.63      | 0.99                  | 0.90     | 0.95                 |
| O7-AA                 | 0.39         | 0.31  | 0.83      | 0.87      | 0.84      | 0.38      | 0.88      | 0.07  | 0.01  | 0.95     | 0.86      | 0.72                  | 0.77     | 0.75                 |



Table S2. Contd.

|                       | $\Delta G_w$ | logP  | C19-GS-O3 | O7-AA-C18 | O7-C19-GS | C18-GS-O7 | O7-C18-GS | HA    | MW    | O7-AA-BC | O3-C19-GS | C19-GS <sub>min</sub> | O7-AA-GS | O3-GS <sub>min</sub> |
|-----------------------|--------------|-------|-----------|-----------|-----------|-----------|-----------|-------|-------|----------|-----------|-----------------------|----------|----------------------|
| C19-GS                | 0.46         | 0.32  | 0.80      | 0.82      | 0.81      | 0.79      | 0.70      | 0.04  | 0.12  | 0.73     | 0.66      | 0.97                  | 0.91     | 0.94                 |
| BC-GS                 | 0.49         | 0.36  | 0.81      | 0.78      | 0.83      | 0.79      | 0.73      | 0.00  | 0.15  | 0.69     | 0.67      | 0.96                  | 0.92     | 0.94                 |
| GS-O3-C18             | 0.47         | 0.35  | 0.90      | 0.79      | 0.92      | 0.55      | 0.92      | 0.01  | 0.08  | 0.82     | 0.91      | 0.85                  | 0.90     | 0.91                 |
| GS-O3-C19             | 0.33         | 0.16  | 0.86      | 0.85      | 0.86      | 0.55      | 0.79      | 0.10  | 0.04  | 0.83     | 0.89      | 0.87                  | 0.88     | 0.90                 |
| GS-O7-C19             | 0.41         | 0.24  | 0.80      | 0.79      | 0.84      | 0.70      | 0.64      | 0.06  | 0.08  | 0.63     | 0.60      | 0.87                  | 0.86     | 0.87                 |
| C18-GS                | 0.44         | 0.32  | 0.73      | 0.76      | 0.75      | 0.78      | 0.66      | 0.02  | 0.13  | 0.67     | 0.61      | 0.95                  | 0.86     | 0.90                 |
| O7-GS <sub>max</sub>  | 0.48         | 0.37  | 0.81      | 0.78      | 0.82      | 0.80      | 0.73      | 0.10  | 0.23  | 0.70     | 0.67      | 0.93                  | 0.92     | 0.92                 |
| O3-GS <sub>max</sub>  | 0.47         | 0.37  | 0.83      | 0.79      | 0.84      | 0.78      | 0.75      | 0.12  | 0.26  | 0.71     | 0.69      | 0.92                  | 0.92     | 0.92                 |
| BC-GS <sub>max</sub>  | 0.45         | 0.34  | 0.74      | 0.73      | 0.76      | 0.79      | 0.66      | 0.07  | 0.25  | 0.64     | 0.60      | 0.91                  | 0.87     | 0.88                 |
| O3-AA-C20             | 0.37         | 0.29  | 0.86      | 0.80      | 0.87      | 0.35      | 0.92      | 0.07  | 0.05  | 0.88     | 0.92      | 0.71                  | 0.80     | 0.78                 |
| SASA <sub>side</sub>  | -0.01        | 0.12  | -0.13     | -0.06     | -0.10     | 0.18      | 0.00      | 0.53  | 0.75  | -0.05    | -0.17     | -0.03                 | 0.01     | -0.06                |
| C19-GS <sub>max</sub> | 0.40         | 0.31  | 0.68      | 0.70      | 0.69      | 0.78      | 0.59      | 0.07  | 0.23  | 0.61     | 0.53      | 0.90                  | 0.81     | 0.84                 |
| KierFlex              | 0.00         | 0.09  | 0.04      | 0.04      | 0.10      | 0.19      | 0.15      | 0.61  | 0.90  | 0.04     | 0.00      | 0.09                  | 0.15     | 0.08                 |
| C18-AA                | 0.12         | -0.07 | 0.61      | 0.77      | 0.57      | 0.64      | 0.31      | 0.12  | -0.12 | 0.61     | 0.44      | 0.74                  | 0.67     | 0.72                 |
| C18-GS <sub>max</sub> | 0.38         | 0.28  | 0.63      | 0.67      | 0.63      | 0.75      | 0.55      | 0.08  | 0.22  | 0.58     | 0.50      | 0.86                  | 0.77     | 0.80                 |
| GS-O3-AA              | -0.14        | -0.10 | 0.26      | 0.30      | 0.29      | 0.20      | 0.34      | 0.34  | 0.42  | 0.34     | 0.37      | 0.45                  | 0.40     | 0.43                 |
| O3-AA-C19             | 0.25         | 0.16  | 0.76      | 0.81      | 0.76      | 0.38      | 0.76      | 0.03  | -0.15 | 0.86     | 0.80      | 0.75                  | 0.73     | 0.79                 |
| O3-AA-C18             | 0.21         | 0.08  | 0.83      | 0.89      | 0.83      | 0.45      | 0.76      | 0.14  | -0.04 | 0.91     | 0.85      | 0.81                  | 0.82     | 0.86                 |
| C19-AA                | 0.11         | -0.05 | 0.71      | 0.87      | 0.65      | 0.55      | 0.49      | 0.19  | -0.05 | 0.81     | 0.61      | 0.75                  | 0.72     | 0.75                 |
| BC-AA                 | 0.17         | 0.06  | 0.79      | 0.89      | 0.76      | 0.50      | 0.68      | 0.14  | -0.02 | 0.89     | 0.75      | 0.77                  | 0.78     | 0.80                 |
| C19-GS-O7             | 0.31         | 0.20  | 0.57      | 0.64      | 0.59      | 0.70      | 0.51      | 0.09  | 0.19  | 0.55     | 0.46      | 0.88                  | 0.74     | 0.79                 |
| O3-AA                 | 0.21         | 0.16  | 0.76      | 0.77      | 0.78      | 0.26      | 0.83      | 0.12  | 0.02  | 0.88     | 0.88      | 0.66                  | 0.71     | 0.72                 |
| GS-O7-AA              | -0.06        | -0.03 | 0.29      | 0.32      | 0.36      | 0.17      | 0.40      | 0.16  | 0.30  | 0.33     | 0.38      | 0.45                  | 0.41     | 0.41                 |
| O7-AA-C19             | -0.06        | -0.21 | 0.58      | 0.79      | 0.54      | 0.48      | 0.36      | 0.22  | -0.11 | 0.73     | 0.53      | 0.71                  | 0.63     | 0.70                 |
| HD                    | 0.06         | -0.11 | -0.06     | 0.10      | -0.11     | 0.09      | -0.14     | 0.19  | -0.19 | 0.07     | -0.10     | 0.06                  | -0.07    | 0.05                 |
| O3-AA-BC              | 0.05         | -0.04 | 0.73      | 0.79      | 0.74      | 0.34      | 0.68      | 0.18  | -0.02 | 0.84     | 0.81      | 0.75                  | 0.74     | 0.79                 |
| SASA                  | 0.21         | 0.26  | 0.42      | 0.45      | 0.44      | 0.52      | 0.46      | 0.54  | 0.66  | 0.43     | 0.32      | 0.50                  | 0.54     | 0.51                 |
| PSA <sub>side</sub>   | -0.10        | -0.17 | -0.02     | 0.08      | -0.04     | 0.09      | -0.13     | -0.01 | -0.04 | 0.01     | -0.03     | 0.20                  | 0.07     | 0.16                 |
| PSA                   | -0.03        | -0.10 | 0.18      | 0.25      | 0.17      | 0.13      | 0.10      | -0.01 | -0.06 | 0.21     | 0.21      | 0.35                  | 0.25     | 0.33                 |

Table S2. Contd.

|                             | O3-C18-GS | MR    | C18-GS-O3 | AA-GS-O7 | O7-GS <sub>min</sub> | O7-AA-C20 | brotN | BC-GS <sub>min</sub> | O3-AA-GS | O7-GS | GS-O7-C18 | AA-GS-O3 | O3-GS | C18-GS <sub>min</sub> |
|-----------------------------|-----------|-------|-----------|----------|----------------------|-----------|-------|----------------------|----------|-------|-----------|----------|-------|-----------------------|
| <b>O3-C18-GS</b>            | 1.00      |       |           |          |                      |           |       |                      |          |       |           |          |       |                       |
| <b>MR</b>                   | 0.15      | 1.00  |           |          |                      |           |       |                      |          |       |           |          |       |                       |
| <b>C18-GS-O3</b>            | 0.94      | 0.13  | 1.00      |          |                      |           |       |                      |          |       |           |          |       |                       |
| <b>AA-GS-O7</b>             | 0.79      | 0.12  | 0.90      | 1.00     |                      |           |       |                      |          |       |           |          |       |                       |
| <b>O7-GS<sub>min</sub></b>  | 0.91      | 0.08  | 0.96      | 0.95     | 1.00                 |           |       |                      |          |       |           |          |       |                       |
| <b>O7-AA-C20</b>            | 0.85      | 0.12  | 0.74      | 0.60     | 0.71                 | 1.00      |       |                      |          |       |           |          |       |                       |
| <b>brotN</b>                | 0.06      | 0.85  | 0.11      | 0.07     | 0.04                 | 0.01      | 1.00  |                      |          |       |           |          |       |                       |
| <b>BC-GS<sub>min</sub></b>  | 0.83      | 0.04  | 0.90      | 0.95     | 0.96                 | 0.64      | 0.02  | 1.00                 |          |       |           |          |       |                       |
| <b>O3-AA-GS</b>             | 0.91      | 0.14  | 0.97      | 0.95     | 0.98                 | 0.71      | 0.09  | 0.96                 | 1.00     |       |           |          |       |                       |
| <b>O7-GS</b>                | 0.90      | 0.18  | 0.95      | 0.96     | 0.98                 | 0.72      | 0.10  | 0.96                 | 0.98     | 1.00  |           |          |       |                       |
| <b>GS-O7-C18</b>            | 0.97      | 0.20  | 0.91      | 0.79     | 0.89                 | 0.89      | 0.11  | 0.84                 | 0.90     | 0.91  | 1.00      |          |       |                       |
| <b>AA-GS-O3</b>             | 0.73      | 0.13  | 0.87      | 0.97     | 0.92                 | 0.54      | 0.12  | 0.93                 | 0.93     | 0.92  | 0.74      | 1.00     |       |                       |
| <b>O3-GS</b>                | 0.91      | 0.18  | 0.96      | 0.94     | 0.97                 | 0.73      | 0.11  | 0.96                 | 0.99     | 0.99  | 0.91      | 0.91     | 1.00  |                       |
| <b>C18-GS<sub>min</sub></b> | 0.77      | 0.05  | 0.87      | 0.95     | 0.94                 | 0.60      | 0.06  | 0.98                 | 0.94     | 0.94  | 0.79      | 0.95     | 0.94  | 1.00                  |
| <b>O7-AA</b>                | 0.87      | 0.14  | 0.78      | 0.64     | 0.75                 | 0.98      | 0.04  | 0.67                 | 0.76     | 0.76  | 0.90      | 0.59     | 0.76  | 0.64                  |
| <b>C19-GS</b>               | 0.81      | 0.13  | 0.89      | 0.94     | 0.92                 | 0.63      | 0.09  | 0.97                 | 0.95     | 0.95  | 0.82      | 0.94     | 0.96  | 0.97                  |
| <b>BC-GS</b>                | 0.81      | 0.16  | 0.88      | 0.95     | 0.94                 | 0.62      | 0.10  | 0.97                 | 0.95     | 0.96  | 0.83      | 0.92     | 0.97  | 0.96                  |
| <b>GS-O3-C18</b>            | 0.96      | 0.18  | 0.88      | 0.80     | 0.90                 | 0.86      | 0.09  | 0.85                 | 0.89     | 0.91  | 0.97      | 0.74     | 0.91  | 0.81                  |
| <b>GS-O3-C19</b>            | 0.87      | 0.08  | 0.88      | 0.80     | 0.87                 | 0.80      | 0.09  | 0.84                 | 0.88     | 0.87  | 0.89      | 0.77     | 0.90  | 0.83                  |
| <b>GS-O7-C19</b>            | 0.75      | 0.08  | 0.88      | 0.82     | 0.85                 | 0.54      | 0.15  | 0.87                 | 0.89     | 0.85  | 0.78      | 0.86     | 0.88  | 0.87                  |
| <b>C18-GS</b>               | 0.74      | 0.14  | 0.83      | 0.92     | 0.89                 | 0.58      | 0.08  | 0.95                 | 0.91     | 0.93  | 0.77      | 0.91     | 0.93  | 0.96                  |
| <b>O7-GS<sub>max</sub></b>  | 0.80      | 0.27  | 0.88      | 0.96     | 0.92                 | 0.63      | 0.18  | 0.94                 | 0.94     | 0.97  | 0.83      | 0.93     | 0.96  | 0.93                  |
| <b>O3-GS<sub>max</sub></b>  | 0.82      | 0.29  | 0.89      | 0.93     | 0.92                 | 0.64      | 0.22  | 0.93                 | 0.95     | 0.95  | 0.85      | 0.90     | 0.97  | 0.92                  |
| <b>BC-GS<sub>max</sub></b>  | 0.74      | 0.24  | 0.83      | 0.92     | 0.88                 | 0.55      | 0.19  | 0.93                 | 0.91     | 0.92  | 0.77      | 0.91     | 0.93  | 0.93                  |
| <b>O3-AA-C20</b>            | 0.91      | 0.17  | 0.80      | 0.64     | 0.78                 | 0.96      | 0.08  | 0.68                 | 0.78     | 0.78  | 0.93      | 0.58     | 0.78  | 0.64                  |
| <b>SASA<sub>side</sub></b>  | -0.04     | 0.83  | -0.03     | 0.07     | -0.04                | 0.00      | 0.73  | -0.05                | 0.01     | 0.07  | 0.00      | 0.13     | 0.05  | 0.01                  |
| <b>C19-GS<sub>max</sub></b> | 0.68      | 0.22  | 0.78      | 0.88     | 0.82                 | 0.50      | 0.17  | 0.90                 | 0.87     | 0.87  | 0.71      | 0.88     | 0.89  | 0.91                  |
| <b>KierFlex</b>             | 0.11      | 0.89  | 0.14      | 0.15     | 0.08                 | 0.06      | 0.91  | 0.10                 | 0.16     | 0.18  | 0.17      | 0.22     | 0.20  | 0.13                  |
| <b>C18-AA</b>               | 0.53      | -0.13 | 0.74      | 0.71     | 0.69                 | 0.37      | 0.00  | 0.68                 | 0.72     | 0.67  | 0.51      | 0.75     | 0.70  | 0.72                  |
| <b>C18-GS<sub>max</sub></b> | 0.63      | 0.21  | 0.72      | 0.86     | 0.79                 | 0.47      | 0.13  | 0.88                 | 0.82     | 0.85  | 0.67      | 0.85     | 0.85  | 0.88                  |

Table S2. Contd.

|                           | O3-C18-<br>GS | MR    | C18-<br>GS-O3 | AA-GS-<br>O7 | O7-<br>GS <sub>min</sub> | O7-AA-<br>C20 | brotN | BC-<br>GS <sub>min</sub> | O3-AA-<br>GS | O7-<br>GS | GS-O7-<br>C18 | AA-<br>GS-O3 | O3-<br>GS | C18-<br>GS <sub>min</sub> |
|---------------------------|---------------|-------|---------------|--------------|--------------------------|---------------|-------|--------------------------|--------------|-----------|---------------|--------------|-----------|---------------------------|
| <b>GS-O3-AA</b>           | 0.37          | 0.47  | 0.33          | 0.43         | 0.42                     | 0.37          | 0.26  | 0.46                     | 0.44         | 0.50      | 0.45          | 0.38         | 0.51      | 0.48                      |
| <b>O3-AA-C19</b>          | 0.80          | 0.03  | 0.74          | 0.68         | 0.77                     | 0.88          | -0.15 | 0.72                     | 0.75         | 0.77      | 0.84          | 0.62         | 0.77      | 0.69                      |
| <b>O3-AA-C18</b>          | 0.84          | 0.06  | 0.85          | 0.75         | 0.83                     | 0.87          | 0.02  | 0.78                     | 0.83         | 0.83      | 0.88          | 0.70         | 0.85      | 0.77                      |
| <b>C19-AA</b>             | 0.67          | -0.02 | 0.79          | 0.70         | 0.72                     | 0.61          | 0.07  | 0.68                     | 0.76         | 0.70      | 0.66          | 0.72         | 0.74      | 0.70                      |
| <b>BC-AA</b>              | 0.81          | 0.05  | 0.83          | 0.71         | 0.78                     | 0.78          | 0.05  | 0.72                     | 0.81         | 0.77      | 0.81          | 0.69         | 0.80      | 0.71                      |
| <b>C19-GS-O7</b>          | 0.60          | 0.20  | 0.70          | 0.85         | 0.78                     | 0.47          | 0.12  | 0.88                     | 0.81         | 0.83      | 0.65          | 0.87         | 0.83      | 0.90                      |
| <b>O3-AA</b>              | 0.83          | 0.13  | 0.71          | 0.58         | 0.71                     | 0.92          | 0.02  | 0.63                     | 0.71         | 0.71      | 0.87          | 0.51         | 0.72      | 0.59                      |
| <b>GS-O7-AA</b>           | 0.39          | 0.31  | 0.32          | 0.37         | 0.41                     | 0.37          | 0.11  | 0.47                     | 0.44         | 0.49      | 0.49          | 0.34         | 0.51      | 0.47                      |
| <b>O7-AA-C19</b>          | 0.55          | -0.08 | 0.70          | 0.66         | 0.67                     | 0.51          | -0.02 | 0.65                     | 0.69         | 0.65      | 0.57          | 0.68         | 0.68      | 0.69                      |
| <b>HD</b>                 | -0.10         | -0.09 | -0.02         | 0.11         | 0.02                     | 0.03          | -0.17 | 0.02                     | -0.04        | 0.02      | -0.10         | 0.14         | -0.01     | 0.03                      |
| <b>O3-AA-BC</b>           | 0.77          | 0.08  | 0.76          | 0.68         | 0.77                     | 0.81          | 0.01  | 0.72                     | 0.76         | 0.77      | 0.82          | 0.63         | 0.78      | 0.71                      |
| <b>SASA</b>               | 0.50          | 0.79  | 0.54          | 0.57         | 0.52                     | 0.44          | 0.68  | 0.48                     | 0.55         | 0.61      | 0.53          | 0.60         | 0.59      | 0.51                      |
| <b>PSA<sub>side</sub></b> | -0.03         | -0.29 | 0.08          | 0.17         | 0.16                     | -0.08         | -0.20 | 0.24                     | 0.13         | 0.13      | -0.02         | 0.17         | 0.14      | 0.24                      |
| <b>PSA</b>                | 0.20          | -0.26 | 0.26          | 0.30         | 0.34                     | 0.16          | -0.22 | 0.38                     | 0.30         | 0.31      | 0.21          | 0.27         | 0.31      | 0.36                      |

Table S2. Contd.

|                             | <b>O7-AA</b> | <b>C19-GS</b> | <b>BC-GS</b> | <b>GS-O3-C18</b> | <b>GS-O3-C19</b> | <b>GS-O7-C19</b> | <b>C18-GS</b> | <b>O7-GS<sub>max</sub></b> | <b>O3-GS<sub>max</sub></b> | <b>BC-GS<sub>max</sub></b> | <b>O3-AA-C20</b> | <b>SASA<sub>side</sub></b> | <b>C19-GS<sub>max</sub></b> | <b>KierFlex</b> |
|-----------------------------|--------------|---------------|--------------|------------------|------------------|------------------|---------------|----------------------------|----------------------------|----------------------------|------------------|----------------------------|-----------------------------|-----------------|
| <b>O7-AA</b>                | 1.00         |               |              |                  |                  |                  |               |                            |                            |                            |                  |                            |                             |                 |
| <b>C19-GS</b>               | 0.68         | 1.00          |              |                  |                  |                  |               |                            |                            |                            |                  |                            |                             |                 |
| <b>BC-GS</b>                | 0.66         | 0.99          | 1.00         |                  |                  |                  |               |                            |                            |                            |                  |                            |                             |                 |
| <b>GS-O3-C18</b>            | 0.87         | 0.82          | 0.84         | 1.00             |                  |                  |               |                            |                            |                            |                  |                            |                             |                 |
| <b>GS-O3-C19</b>            | 0.81         | 0.85          | 0.83         | 0.91             | 1.00             |                  |               |                            |                            |                            |                  |                            |                             |                 |
| <b>GS-O7-C19</b>            | 0.58         | 0.87          | 0.86         | 0.71             | 0.81             | 1.00             |               |                            |                            |                            |                  |                            |                             |                 |
| <b>C18-GS</b>               | 0.62         | 0.99          | 0.99         | 0.78             | 0.79             | 0.82             | 1.00          |                            |                            |                            |                  |                            |                             |                 |
| <b>O7-GS<sub>max</sub></b>  | 0.67         | 0.96          | 0.98         | 0.83             | 0.81             | 0.83             | 0.96          | 1.00                       |                            |                            |                  |                            |                             |                 |
| <b>O3-GS<sub>max</sub></b>  | 0.68         | 0.95          | 0.97         | 0.84             | 0.84             | 0.86             | 0.94          | 0.98                       | 1.00                       |                            |                  |                            |                             |                 |
| <b>BC-GS<sub>max</sub></b>  | 0.59         | 0.97          | 0.98         | 0.77             | 0.77             | 0.82             | 0.98          | 0.98                       | 0.98                       | 1.00                       |                  |                            |                             |                 |
| <b>O3-AA-C20</b>            | 0.96         | 0.66          | 0.66         | 0.92             | 0.86             | 0.60             | 0.60          | 0.67                       | 0.68                       | 0.57                       | 1.00             |                            |                             |                 |
| <b>SASA<sub>side</sub></b>  | 0.04         | 0.06          | 0.06         | 0.05             | -0.01            | -0.06            | 0.09          | 0.16                       | 0.15                       | 0.15                       | 0.01             | 1.00                       |                             |                 |
| <b>C19-GS<sub>max</sub></b> | 0.55         | 0.96          | 0.96         | 0.71             | 0.74             | 0.79             | 0.97          | 0.94                       | 0.94                       | 0.98                       | 0.51             | 0.15                       | 1.00                        |                 |
| <b>KierFlex</b>             | 0.09         | 0.21          | 0.21         | 0.15             | 0.13             | 0.17             | 0.21          | 0.31                       | 0.34                       | 0.34                       | 0.09             | 0.80                       | 0.34                        | 1.00            |
| <b>C18-AA</b>               | 0.44         | 0.72          | 0.67         | 0.49             | 0.71             | 0.81             | 0.66          | 0.66                       | 0.68                       | 0.66                       | 0.41             | -0.13                      | 0.65                        | 0.02            |
| <b>C18-GS<sub>max</sub></b> | 0.51         | 0.94          | 0.94         | 0.68             | 0.69             | 0.73             | 0.97          | 0.93                       | 0.92                       | 0.97                       | 0.47             | 0.16                       | 0.99                        | 0.31            |
| <b>GS-O3-AA</b>             | 0.37         | 0.53          | 0.55         | 0.52             | 0.51             | 0.32             | 0.57          | 0.55                       | 0.58                       | 0.58                       | 0.40             | 0.40                       | 0.59                        | 0.36            |
| <b>O3-AA-C19</b>            | 0.88         | 0.70          | 0.69         | 0.86             | 0.80             | 0.58             | 0.66          | 0.68                       | 0.67                       | 0.59                       | 0.87             | -0.04                      | 0.55                        | -0.10           |
| <b>O3-AA-C18</b>            | 0.89         | 0.77          | 0.75         | 0.88             | 0.91             | 0.73             | 0.71          | 0.75                       | 0.77                       | 0.68                       | 0.89             | -0.05                      | 0.63                        | 0.02            |
| <b>C19-AA</b>               | 0.68         | 0.72          | 0.66         | 0.64             | 0.80             | 0.74             | 0.65          | 0.68                       | 0.70                       | 0.64                       | 0.64             | -0.04                      | 0.64                        | 0.10            |
| <b>BC-AA</b>                | 0.85         | 0.74          | 0.70         | 0.80             | 0.86             | 0.69             | 0.67          | 0.71                       | 0.73                       | 0.64                       | 0.82             | -0.01                      | 0.63                        | 0.09            |
| <b>C19-GS-O7</b>            | 0.50         | 0.92          | 0.92         | 0.68             | 0.70             | 0.71             | 0.96          | 0.89                       | 0.86                       | 0.93                       | 0.48             | 0.21                       | 0.94                        | 0.27            |
| <b>O3-AA</b>                | 0.94         | 0.62          | 0.60         | 0.87             | 0.83             | 0.52             | 0.56          | 0.61                       | 0.62                       | 0.52                       | 0.96             | 0.00                       | 0.48                        | 0.03            |
| <b>GS-O7-AA</b>             | 0.37         | 0.55          | 0.58         | 0.50             | 0.48             | 0.41             | 0.60          | 0.53                       | 0.57                       | 0.58                       | 0.39             | 0.21                       | 0.60                        | 0.23            |
| <b>O7-AA-C19</b>            | 0.57         | 0.69          | 0.64         | 0.58             | 0.75             | 0.68             | 0.64          | 0.64                       | 0.66                       | 0.62                       | 0.53             | -0.08                      | 0.62                        | 0.03            |
| <b>HD</b>                   | 0.01         | 0.00          | -0.01        | -0.02            | 0.00             | -0.08            | 0.02          | 0.02                       | -0.07                      | -0.05                      | 0.00             | 0.22                       | -0.07                       | -0.13           |
| <b>O3-AA-BC</b>             | 0.83         | 0.71          | 0.70         | 0.84             | 0.87             | 0.65             | 0.67          | 0.69                       | 0.71                       | 0.62                       | 0.85             | -0.04                      | 0.57                        | 0.01            |
| <b>SASA</b>                 | 0.49         | 0.56          | 0.56         | 0.56             | 0.50             | 0.44             | 0.56          | 0.65                       | 0.63                       | 0.60                       | 0.48             | 0.80                       | 0.57                        | 0.74            |
| <b>PSA<sub>side</sub></b>   | -0.04        | 0.22          | 0.22         | 0.01             | 0.11             | 0.12             | 0.26          | 0.15                       | 0.14                       | 0.19                       | -0.03            | -0.26                      | 0.21                        | -0.21           |
| <b>PSA</b>                  | 0.19         | 0.35          | 0.36         | 0.24             | 0.30             | 0.23             | 0.37          | 0.29                       | 0.28                       | 0.31                       | 0.21             | -0.30                      | 0.31                        | -0.23           |

**Table S2.** Contd.

|                             | <b>C18-AA</b> | <b>C18-GS<sub>max</sub></b> | <b>GS-O3-AA</b> | <b>O3-AA-C19</b> | <b>O3-AA-C18</b> | <b>C19-AA</b> | <b>BC-AA</b> | <b>C19-GS-O7</b> | <b>O3-AA</b> | <b>GS-O7-AA</b> | <b>O7-AA-C19</b> | <b>HD</b> | <b>O3-AA-BC</b> | <b>SASA</b> | <b>PSA<sub>side</sub></b> | <b>PSA</b> |
|-----------------------------|---------------|-----------------------------|-----------------|------------------|------------------|---------------|--------------|------------------|--------------|-----------------|------------------|-----------|-----------------|-------------|---------------------------|------------|
| <b>C18-AA</b>               | 1.00          |                             |                 |                  |                  |               |              |                  |              |                 |                  |           |                 |             |                           |            |
| <b>C18-GS<sub>max</sub></b> | 0.61          | 1.00                        |                 |                  |                  |               |              |                  |              |                 |                  |           |                 |             |                           |            |
| <b>GS-O3-AA</b>             | 0.21          | 0.62                        | 1.00            |                  |                  |               |              |                  |              |                 |                  |           |                 |             |                           |            |
| <b>O3-AA-C19</b>            | 0.48          | 0.53                        | 0.54            | 1.00             |                  |               |              |                  |              |                 |                  |           |                 |             |                           |            |
| <b>O3-AA-C18</b>            | 0.69          | 0.59                        | 0.50            | 0.92             | 1.00             |               |              |                  |              |                 |                  |           |                 |             |                           |            |
| <b>C19-AA</b>               | 0.91          | 0.58                        | 0.29            | 0.65             | 0.83             | 1.00          |              |                  |              |                 |                  |           |                 |             |                           |            |
| <b>BC-AA</b>                | 0.76          | 0.57                        | 0.39            | 0.80             | 0.90             | 0.93          | 1.00         |                  |              |                 |                  |           |                 |             |                           |            |
| <b>C19-GS-O7</b>            | 0.59          | 0.95                        | 0.66            | 0.59             | 0.61             | 0.57          | 0.56         | 1.00             |              |                 |                  |           |                 |             |                           |            |
| <b>O3-AA</b>                | 0.42          | 0.43                        | 0.47            | 0.90             | 0.90             | 0.67          | 0.86         | 0.46             | 1.00         |                 |                  |           |                 |             |                           |            |
| <b>GS-O7-AA</b>             | 0.19          | 0.64                        | 0.89            | 0.49             | 0.45             | 0.22          | 0.34         | 0.65             | 0.45         | 1.00            |                  |           |                 |             |                           |            |
| <b>O7-AA-C19</b>            | 0.92          | 0.58                        | 0.39            | 0.65             | 0.81             | 0.95          | 0.87         | 0.60             | 0.61         | 0.30            | 1.00             |           |                 |             |                           |            |
| <b>HD</b>                   | 0.05          | -0.01                       | -0.06           | 0.14             | 0.04             | 0.04          | -0.01        | 0.11             | 0.00         | -0.16           | 0.07             | 1.00      |                 |             |                           |            |
| <b>O3-AA-BC</b>             | 0.63          | 0.54                        | 0.58            | 0.92             | 0.98             | 0.77          | 0.86         | 0.59             | 0.90         | 0.50            | 0.80             | 0.02      | 1.00            |             |                           |            |
| <b>SASA</b>                 | 0.32          | 0.56                        | 0.56            | 0.44             | 0.47             | 0.43          | 0.49         | 0.59             | 0.45         | 0.39            | 0.37             | 0.21      | 0.46            | 1.00        |                           |            |
| <b>PSA<sub>side</sub></b>   | 0.20          | 0.26                        | 0.13            | 0.00             | 0.11             | 0.13          | 0.07         | 0.29             | 0.03         | 0.22            | 0.22             | 0.26      | 0.11            | -0.16       | 1.00                      |            |
| <b>PSA</b>                  | 0.26          | 0.35                        | 0.23            | 0.22             | 0.32             | 0.26          | 0.25         | 0.37             | 0.27         | 0.31            | 0.33             | 0.23      | 0.32            | -0.08       | 0.96                      | 1.00       |

**Table S3.** Values of structural and physico-chemical descriptors for the aniliny conjugate of glu-CDCA in quantitative CSP-SAR analysis. Conjugates are listed in the decreasing order of  $K_m$  potency.<sup>a</sup>

| <b>CMPD</b> | <b><math>K_m</math> (<math>\mu</math>M)</b> | <b><math>\Delta G_w</math> (kcal/mol)</b> | <b>logP</b> | <b>C19-GS-O3</b> | <b>O7-AA-C18</b> | <b>O7-C19-GS</b> | <b>C18-GS-O7</b> | <b>O7-C18-GS</b> | <b>HA</b> | <b>MW</b> |
|-------------|---------------------------------------------|-------------------------------------------|-------------|------------------|------------------|------------------|------------------|------------------|-----------|-----------|
| <b>9</b>    | 0.100                                       | -79.8                                     | 1.43        | 0.873            | 0.944            | 0.844            | 0.882            | 0.878            | 6         | 610       |
| <b>2</b>    | 0.100                                       | -73.8                                     | 2.04        | 0.808            | 0.837            | 0.820            | 0.843            | 0.849            | 6         | 630       |
| <b>6</b>    | 0.100                                       | -70.4                                     | 2.07        | 0.566            | 0.619            | 0.647            | 0.791            | 0.542            | 6         | 614       |
| <b>5</b>    | 0.450                                       | -75.2                                     | 1.45        | 0.869            | 0.927            | 0.853            | 0.909            | 0.834            | 6         | 614       |
| <b>22</b>   | 0.549                                       | -74.2                                     | 1.60        | 0.851            | 0.842            | 0.843            | 0.750            | 0.881            | 6         | 632       |
| <b>1</b>    | 0.823                                       | -79.3                                     | 1.10        | 0.870            | 0.860            | 0.856            | 0.767            | 0.858            | 6         | 596       |
| <b>8</b>    | 0.919                                       | -78.1                                     | 1.65        | 0.825            | 0.745            | 0.742            | 0.857            | 0.747            | 6         | 610       |
| <b>4</b>    | 1.11                                        | -78.6                                     | 1.15        | 0.754            | 0.785            | 0.805            | 0.653            | 0.875            | 6         | 614       |
| <b>11</b>   | 1.21                                        | -80.6                                     | 0.248       | 0.907            | 0.948            | 0.905            | 0.907            | 0.897            | 7         | 626       |
| <b>7</b>    | 1.69                                        | -79.4                                     | 1.58        | 0.815            | 0.875            | 0.789            | 0.666            | 0.838            | 6         | 610       |
| <b>3</b>    | 2.22                                        | -69.5                                     | 2.57        | 0.788            | 0.797            | 0.753            | 0.926            | 0.760            | 6         | 664       |
| <b>24</b>   | 2.53                                        | -75.7                                     | 2.12        | 0.612            | 0.623            | 0.636            | 0.468            | 0.809            | 6         | 624       |
| <b>16</b>   | 2.54                                        | -74.0                                     | 1.99        | 0.828            | 0.936            | 0.867            | 0.847            | 0.889            | 8         | 668       |
| <b>14</b>   | 3.42                                        | -75.6                                     | 1.22        | 0.894            | 0.953            | 0.870            | 0.893            | 0.882            | 8         | 650       |
| <b>10</b>   | 3.87                                        | -80.6                                     | 0.303       | 0.762            | 0.818            | 0.832            | 0.669            | 0.889            | 7         | 626       |
| <b>12</b>   | 6.56                                        | -79.6                                     | 0.441       | 0.927            | 0.909            | 0.885            | 0.922            | 0.883            | 7         | 626       |
| <b>15</b>   | 7.27                                        | -76.9                                     | 1.71        | 0.908            | 0.892            | 0.864            | 0.730            | 0.885            | 8         | 669       |
| <b>23</b>   | 7.82                                        | -79.1                                     | 2.04        | 0.876            | 0.875            | 0.857            | 0.748            | 0.894            | 6         | 624       |
| <b>21</b>   | 7.91                                        | -82.5                                     | 0.067       | 0.848            | 0.869            | 0.811            | 0.697            | 0.800            | 7         | 611       |
| <b>19</b>   | 9.89                                        | -75.4                                     | 0.748       | 0.859            | 0.878            | 0.859            | 0.806            | 0.814            | 7         | 611       |
| <b>17</b>   | 10.3                                        | -79.6                                     | 1.09        | 0.856            | 0.912            | 0.869            | 0.894            | 0.915            | 7         | 650       |
| <b>25</b>   | 11.4                                        | -77.0                                     | -0.033      | 0.790            | 0.782            | 0.773            | 0.874            | 0.752            | 6         | 656       |
| <b>20</b>   | 14.9                                        | -84.1                                     | -0.061      | 0.823            | 0.873            | 0.769            | 0.812            | 0.805            | 7         | 611       |
| <b>18</b>   | 17.5                                        | -73.4                                     | 1.72        | 0.453            | 0.699            | 0.463            | 0.812            | 0.449            | 7         | 626       |
| <b>26</b>   | 495                                         | -88.1                                     | 2.25        | 0.745            | 0.692            | 0.789            | 0.781            | 0.872            | 8         | 730       |
| <b>27</b>   | 607                                         | -165                                      | -5.41       | 0.291            | 0.574            | 0.359            | 0.308            | 0.286            | 8         | 639       |

**Table S3.** Contd.

| <b>CMPD</b> | <b>K<sub>m</sub> (μM)</b> | <b>AA-GS-O7</b> | <b>O7-GS<sub>min</sub></b> | <b>O7-AA-C20</b> | <b>brofN</b> | <b>BC-GS<sub>min</sub></b> | <b>O3-AA-GS</b> | <b>O7-GS</b> | <b>GS-O7-C18</b> |
|-------------|---------------------------|-----------------|----------------------------|------------------|--------------|----------------------------|-----------------|--------------|------------------|
| <b>9</b>    | 0.100                     | 0.893           | 0.887                      | 0.931            | 12           | 0.881                      | 0.866           | 0.856        | 0.872            |
| <b>2</b>    | 0.100                     | 0.825           | 0.794                      | 0.831            | 12           | 0.877                      | 0.846           | 0.782        | 0.848            |
| <b>6</b>    | 0.100                     | 0.579           | 0.549                      | 0.604            | 12           | 0.588                      | 0.560           | 0.545        | 0.557            |
| <b>5</b>    | 0.450                     | 0.835           | 0.880                      | 0.916            | 12           | 0.841                      | 0.851           | 0.835        | 0.835            |
| <b>22</b>   | 0.549                     | 0.726           | 0.757                      | 0.883            | 12           | 0.722                      | 0.760           | 0.735        | 0.856            |
| <b>1</b>    | 0.823                     | 0.781           | 0.808                      | 0.891            | 12           | 0.794                      | 0.799           | 0.762        | 0.878            |
| <b>8</b>    | 0.919                     | 0.702           | 0.732                      | 0.771            | 12           | 0.620                      | 0.718           | 0.675        | 0.725            |
| <b>4</b>    | 1.11                      | 0.598           | 0.676                      | 0.887            | 12           | 0.663                      | 0.687           | 0.644        | 0.822            |
| <b>11</b>   | 1.21                      | 0.873           | 0.885                      | 0.937            | 13           | 0.892                      | 0.895           | 0.875        | 0.916            |
| <b>7</b>    | 1.69                      | 0.566           | 0.637                      | 0.900            | 12           | 0.577                      | 0.649           | 0.603        | 0.797            |
| <b>3</b>    | 2.22                      | 0.839           | 0.755                      | 0.802            | 13           | 0.801                      | 0.801           | 0.745        | 0.763            |
| <b>24</b>   | 2.53                      | 0.453           | 0.451                      | 0.863            | 12           | 0.428                      | 0.444           | 0.468        | 0.675            |
| <b>16</b>   | 2.54                      | 0.788           | 0.790                      | 0.936            | 15           | 0.827                      | 0.792           | 0.795        | 0.898            |
| <b>14</b>   | 3.42                      | 0.853           | 0.817                      | 0.934            | 13           | 0.806                      | 0.863           | 0.832        | 0.888            |
| <b>10</b>   | 3.87                      | 0.621           | 0.698                      | 0.895            | 13           | 0.706                      | 0.724           | 0.675        | 0.842            |
| <b>12</b>   | 6.56                      | 0.893           | 0.861                      | 0.884            | 13           | 0.885                      | 0.884           | 0.845        | 0.896            |
| <b>15</b>   | 7.27                      | 0.699           | 0.701                      | 0.908            | 15           | 0.627                      | 0.768           | 0.688        | 0.843            |
| <b>23</b>   | 7.82                      | 0.711           | 0.707                      | 0.941            | 12           | 0.701                      | 0.799           | 0.714        | 0.841            |
| <b>21</b>   | 7.91                      | 0.736           | 0.782                      | 0.894            | 12           | 0.798                      | 0.770           | 0.737        | 0.828            |
| <b>19</b>   | 9.89                      | 0.833           | 0.796                      | 0.896            | 12           | 0.770                      | 0.787           | 0.747        | 0.834            |
| <b>17</b>   | 10.3                      | 0.844           | 0.799                      | 0.923            | 13           | 0.779                      | 0.835           | 0.868        | 0.898            |
| <b>25</b>   | 11.4                      | 0.721           | 0.712                      | 0.786            | 14           | 0.698                      | 0.730           | 0.688        | 0.740            |
| <b>20</b>   | 14.9                      | 0.812           | 0.815                      | 0.894            | 12           | 0.796                      | 0.779           | 0.791        | 0.808            |
| <b>18</b>   | 17.5                      | 0.551           | 0.451                      | 0.704            | 13           | 0.460                      | 0.467           | 0.433        | 0.468            |
| <b>26</b>   | 495                       | 0.766           | 0.794                      | 0.836            | 16           | 0.753                      | 0.799           | 0.796        | 0.862            |
| <b>27</b>   | 607                       | 0.296           | 0.285                      | 0.638            | 13           | 0.297                      | 0.335           | 0.284        | 0.422            |

**Table S3.** Contd.

| <b>CMPD</b> | <b>K<sub>m</sub> (μM)</b> | <b>AA-GS-O3</b> | <b>O3-GS</b> | <b>C18-GS<sub>min</sub></b> | <b>O7-AA</b> | <b>C19-GS</b> | <b>BC-GS</b> | <b>GS-O3-C18</b> | <b>GS-O3-C19</b> | <b>GS-O7-C19</b> |
|-------------|---------------------------|-----------------|--------------|-----------------------------|--------------|---------------|--------------|------------------|------------------|------------------|
| <b>9</b>    | 0.100                     | 0.885           | 0.818        | 0.862                       | 0.930        | 0.839         | 0.847        | 0.886            | 0.862            | 0.841            |
| <b>2</b>    | 0.100                     | 0.868           | 0.792        | 0.828                       | 0.845        | 0.823         | 0.832        | 0.845            | 0.778            | 0.805            |
| <b>6</b>    | 0.100                     | 0.636           | 0.529        | 0.607                       | 0.601        | 0.577         | 0.581        | 0.577            | 0.602            | 0.792            |
| <b>5</b>    | 0.450                     | 0.848           | 0.815        | 0.842                       | 0.930        | 0.762         | 0.782        | 0.869            | 0.819            | 0.823            |
| <b>22</b>   | 0.549                     | 0.736           | 0.725        | 0.721                       | 0.873        | 0.702         | 0.701        | 0.868            | 0.858            | 0.809            |
| <b>1</b>    | 0.823                     | 0.807           | 0.745        | 0.805                       | 0.856        | 0.719         | 0.707        | 0.895            | 0.849            | 0.843            |
| <b>8</b>    | 0.919                     | 0.670           | 0.670        | 0.611                       | 0.779        | 0.597         | 0.592        | 0.822            | 0.790            | 0.702            |
| <b>4</b>    | 1.11                      | 0.640           | 0.656        | 0.670                       | 0.892        | 0.642         | 0.625        | 0.843            | 0.811            | 0.754            |
| <b>11</b>   | 1.21                      | 0.913           | 0.848        | 0.885                       | 0.928        | 0.830         | 0.843        | 0.928            | 0.876            | 0.876            |
| <b>7</b>    | 1.69                      | 0.590           | 0.611        | 0.550                       | 0.908        | 0.562         | 0.544        | 0.783            | 0.688            | 0.725            |
| <b>3</b>    | 2.22                      | 0.799           | 0.751        | 0.773                       | 0.808        | 0.774         | 0.810        | 0.780            | 0.789            | 0.791            |
| <b>24</b>   | 2.53                      | 0.417           | 0.435        | 0.429                       | 0.804        | 0.427         | 0.435        | 0.726            | 0.638            | 0.524            |
| <b>16</b>   | 2.54                      | 0.812           | 0.806        | 0.819                       | 0.926        | 0.814         | 0.808        | 0.916            | 0.877            | 0.860            |
| <b>14</b>   | 3.42                      | 0.868           | 0.852        | 0.836                       | 0.926        | 0.839         | 0.840        | 0.887            | 0.860            | 0.853            |
| <b>10</b>   | 3.87                      | 0.668           | 0.692        | 0.712                       | 0.892        | 0.679         | 0.662        | 0.872            | 0.846            | 0.787            |
| <b>12</b>   | 6.56                      | 0.883           | 0.874        | 0.887                       | 0.886        | 0.848         | 0.865        | 0.913            | 0.885            | 0.877            |
| <b>15</b>   | 7.27                      | 0.721           | 0.692        | 0.637                       | 0.905        | 0.637         | 0.622        | 0.790            | 0.817            | 0.824            |
| <b>23</b>   | 7.82                      | 0.751           | 0.735        | 0.703                       | 0.933        | 0.732         | 0.691        | 0.820            | 0.835            | 0.826            |
| <b>21</b>   | 7.91                      | 0.745           | 0.781        | 0.765                       | 0.859        | 0.715         | 0.734        | 0.873            | 0.861            | 0.822            |
| <b>19</b>   | 9.89                      | 0.848           | 0.732        | 0.742                       | 0.894        | 0.676         | 0.673        | 0.825            | 0.802            | 0.823            |
| <b>17</b>   | 10.3                      | 0.865           | 0.839        | 0.772                       | 0.923        | 0.799         | 0.832        | 0.928            | 0.864            | 0.840            |
| <b>25</b>   | 11.4                      | 0.825           | 0.698        | 0.710                       | 0.777        | 0.687         | 0.688        | 0.787            | 0.791            | 0.821            |
| <b>20</b>   | 14.9                      | 0.824           | 0.745        | 0.785                       | 0.888        | 0.791         | 0.777        | 0.874            | 0.824            | 0.752            |
| <b>18</b>   | 17.5                      | 0.647           | 0.421        | 0.562                       | 0.711        | 0.493         | 0.422        | 0.564            | 0.617            | 0.600            |
| <b>26</b>   | 495                       | 0.787           | 0.773        | 0.743                       | 0.847        | 0.713         | 0.742        | 0.890            | 0.767            | 0.773            |
| <b>27</b>   | 607                       | 0.371           | 0.301        | 0.371                       | 0.642        | 0.375         | 0.311        | 0.495            | 0.613            | 0.589            |



Table S3. Contd.

| <b>CMPD</b> | <b>K<sub>m</sub> (μM)</b> | <b>C18-GS</b> | <b>O7-GS<sub>max</sub></b> | <b>O3-GS<sub>max</sub></b> | <b>BC-GS<sub>max</sub></b> | <b>O3-AA-C20</b> | <b>SASA<sub>side</sub> (Å<sup>2</sup>)</b> | <b>C19-GS<sub>max</sub></b> | <b>KierFlex</b> | <b>C18-AA</b> |
|-------------|---------------------------|---------------|----------------------------|----------------------------|----------------------------|------------------|--------------------------------------------|-----------------------------|-----------------|---------------|
| <b>9</b>    | 0.100                     | 0.855         | 0.829                      | 0.774                      | 0.814                      | 0.945            | 533                                        | 0.805                       | 8.79            | 0.930         |
| <b>2</b>    | 0.100                     | 0.855         | 0.807                      | 0.779                      | 0.834                      | 0.810            | 518                                        | 0.846                       | 9.39            | 0.864         |
| <b>6</b>    | 0.100                     | 0.581         | 0.528                      | 0.513                      | 0.549                      | 0.553            | 491                                        | 0.556                       | 8.71            | 0.779         |
| <b>5</b>    | 0.450                     | 0.769         | 0.755                      | 0.739                      | 0.717                      | 0.924            | 508                                        | 0.684                       | 8.71            | 0.917         |
| <b>22</b>   | 0.549                     | 0.683         | 0.658                      | 0.665                      | 0.644                      | 0.926            | 516                                        | 0.647                       | 8.87            | 0.847         |
| <b>1</b>    | 0.823                     | 0.712         | 0.660                      | 0.639                      | 0.629                      | 0.910            | 497                                        | 0.617                       | 8.55            | 0.907         |
| <b>8</b>    | 0.919                     | 0.551         | 0.592                      | 0.597                      | 0.548                      | 0.813            | 525                                        | 0.546                       | 8.79            | 0.878         |
| <b>4</b>    | 1.11                      | 0.622         | 0.550                      | 0.569                      | 0.546                      | 0.932            | 501                                        | 0.565                       | 8.71            | 0.781         |
| <b>11</b>   | 1.21                      | 0.833         | 0.815                      | 0.784                      | 0.782                      | 0.947            | 548                                        | 0.755                       | 9.27            | 0.935         |
| <b>7</b>    | 1.69                      | 0.514         | 0.505                      | 0.521                      | 0.481                      | 0.881            | 522                                        | 0.498                       | 8.79            | 0.774         |
| <b>3</b>    | 2.22                      | 0.796         | 0.744                      | 0.738                      | 0.784                      | 0.792            | 547                                        | 0.764                       | 9.28            | 0.851         |
| <b>24</b>   | 2.53                      | 0.436         | 0.441                      | 0.432                      | 0.422                      | 0.799            | 546                                        | 0.417                       | 9.03            | 0.514         |
| <b>16</b>   | 2.54                      | 0.806         | 0.767                      | 0.770                      | 0.774                      | 0.924            | 612                                        | 0.778                       | 10.10           | 0.918         |
| <b>14</b>   | 3.42                      | 0.849         | 0.862                      | 0.861                      | 0.839                      | 0.925            | 579                                        | 0.831                       | 9.66            | 0.935         |
| <b>10</b>   | 3.87                      | 0.665         | 0.613                      | 0.628                      | 0.618                      | 0.924            | 544                                        | 0.615                       | 9.27            | 0.796         |
| <b>12</b>   | 6.56                      | 0.837         | 0.839                      | 0.835                      | 0.835                      | 0.896            | 547                                        | 0.826                       | 9.27            | 0.924         |
| <b>15</b>   | 7.27                      | 0.589         | 0.672                      | 0.667                      | 0.614                      | 0.934            | 568                                        | 0.583                       | 9.87            | 0.894         |
| <b>23</b>   | 7.82                      | 0.695         | 0.632                      | 0.639                      | 0.621                      | 0.931            | 544                                        | 0.659                       | 9.03            | 0.844         |
| <b>21</b>   | 7.91                      | 0.714         | 0.672                      | 0.703                      | 0.673                      | 0.906            | 513                                        | 0.654                       | 8.79            | 0.862         |
| <b>19</b>   | 9.89                      | 0.629         | 0.690                      | 0.648                      | 0.610                      | 0.921            | 507                                        | 0.568                       | 8.79            | 0.894         |
| <b>17</b>   | 10.3                      | 0.836         | 0.859                      | 0.793                      | 0.806                      | 0.935            | 680                                        | 0.751                       | 9.66            | 0.909         |
| <b>25</b>   | 11.4                      | 0.671         | 0.667                      | 0.667                      | 0.699                      | 0.787            | 591                                        | 0.681                       | 10.01           | 0.867         |
| <b>20</b>   | 14.9                      | 0.793         | 0.733                      | 0.640                      | 0.692                      | 0.915            | 522                                        | 0.704                       | 8.79            | 0.849         |
| <b>18</b>   | 17.5                      | 0.484         | 0.409                      | 0.407                      | 0.414                      | 0.625            | 657                                        | 0.487                       | 9.27            | 0.744         |
| <b>26</b>   | 495                       | 0.709         | 0.751                      | 0.733                      | 0.708                      | 0.915            | 698                                        | 0.685                       | 10.39           | 0.699         |
| <b>27</b>   | 607                       | 0.358         | 0.286                      | 0.314                      | 0.318                      | 0.587            | 540                                        | 0.385                       | 9.12            | 0.789         |

**Table S3.** Contd.

| <b>CMPD</b> | <b>K<sub>m</sub> (μM)</b> | <b>C18-GS<sub>max</sub></b> | <b>GS-O3-AA</b> | <b>O3-AA-C19</b> | <b>O3-AA-C18</b> | <b>C19-AA</b> | <b>BC-AA</b> | <b>C19-GS-O7</b> | <b>O3-AA</b> | <b>GS-O7-AA</b> |
|-------------|---------------------------|-----------------------------|-----------------|------------------|------------------|---------------|--------------|------------------|--------------|-----------------|
| <b>9</b>    | 0.100                     | 0.821                       | 0.817           | 0.944            | 0.909            | 0.916         | 0.934        | 0.916            | 0.927        | 0.825           |
| <b>2</b>    | 0.100                     | 0.837                       | 0.712           | 0.806            | 0.787            | 0.875         | 0.872        | 0.918            | 0.832        | 0.753           |
| <b>6</b>    | 0.100                     | 0.543                       | 0.545           | 0.579            | 0.563            | 0.582         | 0.552        | 0.650            | 0.539        | 0.698           |
| <b>5</b>    | 0.450                     | 0.655                       | 0.686           | 0.915            | 0.945            | 0.915         | 0.921        | 0.776            | 0.920        | 0.709           |
| <b>22</b>   | 0.549                     | 0.621                       | 0.781           | 0.808            | 0.849            | 0.842         | 0.877        | 0.743            | 0.940        | 0.846           |
| <b>1</b>    | 0.823                     | 0.571                       | 0.721           | 0.928            | 0.915            | 0.870         | 0.853        | 0.805            | 0.881        | 0.718           |
| <b>8</b>    | 0.919                     | 0.488                       | 0.651           | 0.793            | 0.780            | 0.850         | 0.871        | 0.606            | 0.828        | 0.626           |
| <b>4</b>    | 1.11                      | 0.512                       | 0.690           | 0.858            | 0.818            | 0.782         | 0.860        | 0.685            | 0.915        | 0.761           |
| <b>11</b>   | 1.21                      | 0.748                       | 0.815           | 0.963            | 0.939            | 0.920         | 0.936        | 0.865            | 0.922        | 0.817           |
| <b>7</b>    | 1.69                      | 0.447                       | 0.628           | 0.867            | 0.805            | 0.817         | 0.878        | 0.586            | 0.886        | 0.725           |
| <b>3</b>    | 2.22                      | 0.781                       | 0.784           | 0.796            | 0.790            | 0.791         | 0.786        | 0.861            | 0.785        | 0.796           |
| <b>24</b>   | 2.53                      | 0.410                       | 0.688           | 0.761            | 0.674            | 0.511         | 0.588        | 0.551            | 0.778        | 0.699           |
| <b>16</b>   | 2.54                      | 0.746                       | 0.758           | 0.875            | 0.922            | 0.909         | 0.921        | 0.815            | 0.933        | 0.762           |
| <b>14</b>   | 3.42                      | 0.849                       | 0.918           | 0.933            | 0.915            | 0.931         | 0.924        | 0.887            | 0.919        | 0.893           |
| <b>10</b>   | 3.87                      | 0.562                       | 0.708           | 0.855            | 0.828            | 0.792         | 0.860        | 0.739            | 0.926        | 0.776           |
| <b>12</b>   | 6.56                      | 0.814                       | 0.821           | 0.893            | 0.905            | 0.931         | 0.942        | 0.865            | 0.898        | 0.803           |
| <b>15</b>   | 7.27                      | 0.537                       | 0.569           | 0.737            | 0.830            | 0.925         | 0.882        | 0.646            | 0.853        | 0.607           |
| <b>23</b>   | 7.82                      | 0.591                       | 0.708           | 0.926            | 0.866            | 0.846         | 0.886        | 0.743            | 0.911        | 0.751           |
| <b>21</b>   | 7.91                      | 0.666                       | 0.826           | 0.923            | 0.898            | 0.839         | 0.826        | 0.814            | 0.869        | 0.807           |
| <b>19</b>   | 9.89                      | 0.517                       | 0.601           | 0.917            | 0.898            | 0.878         | 0.884        | 0.687            | 0.918        | 0.610           |
| <b>17</b>   | 10.3                      | 0.775                       | 0.848           | 0.950            | 0.919            | 0.899         | 0.923        | 0.898            | 0.923        | 0.869           |
| <b>25</b>   | 11.4                      | 0.638                       | 0.681           | 0.701            | 0.748            | 0.824         | 0.789        | 0.765            | 0.726        | 0.698           |
| <b>20</b>   | 14.9                      | 0.723                       | 0.694           | 0.874            | 0.847            | 0.837         | 0.874        | 0.856            | 0.894        | 0.737           |
| <b>18</b>   | 17.5                      | 0.439                       | 0.613           | 0.659            | 0.605            | 0.712         | 0.685        | 0.667            | 0.654        | 0.594           |
| <b>26</b>   | 495                       | 0.656                       | 0.919           | 0.844            | 0.800            | 0.703         | 0.794        | 0.826            | 0.893        | 0.857           |
| <b>27</b>   | 607                       | 0.341                       | 0.751           | 0.651            | 0.675            | 0.750         | 0.711        | 0.556            | 0.693        | 0.743           |

Table S3. Contd.

| <b>CMPD</b> | <b>K<sub>m</sub> (μM)</b> | <b>O7-AA-C19</b> | <b>HD</b> | <b>O3-AA-BC</b> | <b>SASA (Å<sup>2</sup>)</b> | <b>PSA<sub>side</sub> (Å<sup>2</sup>)</b> | <b>PSA (Å<sup>2</sup>)</b> |
|-------------|---------------------------|------------------|-----------|-----------------|-----------------------------|-------------------------------------------|----------------------------|
| <b>9</b>    | 0.100                     | 0.944            | 4         | 0.931           | 993                         | 173                                       | 251                        |
| <b>2</b>    | 0.100                     | 0.910            | 4         | 0.796           | 965                         | 225                                       | 299                        |
| <b>6</b>    | 0.100                     | 0.626            | 4         | 0.570           | 877                         | 199                                       | 255                        |
| <b>5</b>    | 0.450                     | 0.954            | 4         | 0.951           | 953                         | 251                                       | 328                        |
| <b>22</b>   | 0.549                     | 0.845            | 4         | 0.858           | 941                         | 245                                       | 322                        |
| <b>1</b>    | 0.823                     | 0.920            | 4         | 0.946           | 956                         | 173                                       | 251                        |
| <b>8</b>    | 0.919                     | 0.883            | 4         | 0.804           | 960                         | 162                                       | 240                        |
| <b>4</b>    | 1.11                      | 0.798            | 4         | 0.848           | 918                         | 207                                       | 285                        |
| <b>11</b>   | 1.21                      | 0.969            | 4         | 0.955           | 1005                        | 186                                       | 264                        |
| <b>7</b>    | 1.69                      | 0.785            | 4         | 0.795           | 942                         | 167                                       | 245                        |
| <b>3</b>    | 2.22                      | 0.816            | 4         | 0.795           | 966                         | 236                                       | 303                        |
| <b>24</b>   | 2.53                      | 0.532            | 4         | 0.704           | 906                         | 153                                       | 232                        |
| <b>16</b>   | 2.54                      | 0.940            | 4         | 0.920           | 1074                        | 185                                       | 263                        |
| <b>14</b>   | 3.42                      | 0.973            | 4         | 0.923           | 1035                        | 191                                       | 269                        |
| <b>10</b>   | 3.87                      | 0.806            | 4         | 0.846           | 959                         | 177                                       | 255                        |
| <b>12</b>   | 6.56                      | 0.926            | 4         | 0.924           | 996                         | 186                                       | 263                        |
| <b>15</b>   | 7.27                      | 0.855            | 4         | 0.801           | 1006                        | 181                                       | 256                        |
| <b>23</b>   | 7.82                      | 0.850            | 4         | 0.873           | 973                         | 164                                       | 242                        |
| <b>21</b>   | 7.91                      | 0.889            | 5         | 0.900           | 960                         | 239                                       | 317                        |
| <b>19</b>   | 9.89                      | 0.911            | 5         | 0.914           | 971                         | 192                                       | 270                        |
| <b>17</b>   | 10.3                      | 0.942            | 5         | 0.938           | 1111                        | 187                                       | 265                        |
| <b>25</b>   | 11.4                      | 0.820            | 4         | 0.739           | 993                         | 173                                       | 237                        |
| <b>20</b>   | 14.9                      | 0.861            | 5         | 0.859           | 987                         | 245                                       | 323                        |
| <b>18</b>   | 17.5                      | 0.717            | 5         | 0.608           | 989                         | 188                                       | 241                        |
| <b>26</b>   | 495                       | 0.718            | 4         | 0.858           | 1122                        | 187                                       | 264                        |
| <b>27</b>   | 607                       | 0.863            | 4         | 0.762           | 891                         | 215                                       | 275                        |

<sup>a</sup> Entries for structural descriptors are the overlap coefficients of the conjugate with respect to **13**, the most potent compound in terms of K<sub>m</sub> and V<sub>max</sub>.

**Table S4.** Results from single-variable regression of molecular descriptors against  $K_m$  for Set 1.<sup>a</sup>

| Molecular Descriptor                    | $r^2$  | Coeff. indep. variable <sup>b</sup> | SEM of coeff. Indep. Variable <sup>b</sup> | Coeff. of intercept ( $\mu\text{M}$ ) | SEM of coeff. of intercept ( $\mu\text{M}$ ) |
|-----------------------------------------|--------|-------------------------------------|--------------------------------------------|---------------------------------------|----------------------------------------------|
| $\Delta G_w$ (kcal/mol)                 | 0.679  | -6.97                               | 0.98                                       | -517                                  | 81                                           |
| logP                                    | 0.344  | -57.7                               | 16                                         | 107                                   | 30                                           |
| C19-GS-O3                               | 0.331  | -578                                | 168                                        | 500                                   | 134                                          |
| O7-AA-C18                               | 0.290  | -744                                | 238                                        | 661                                   | 198                                          |
| O7-C19-GS                               | 0.286  | -621                                | 200                                        | 533                                   | 159                                          |
| C18-GS-O7                               | 0.276  | -550                                | 182                                        | 474                                   | 143                                          |
| O7-C18-GS                               | 0.247  | -496                                | 177                                        | 443                                   | 144                                          |
| HA                                      | 0.246  | 93.9                                | 34                                         | -582                                  | 226                                          |
| MW                                      | 0.246  | 2.62                                | 0.94                                       | -1610                                 | 593                                          |
| O7-AA-BC                                | 0.232  | -689                                | 256                                        | 638                                   | 222                                          |
| O3-C19-GS                               | 0.218  | -609                                | 235                                        | 537                                   | 191                                          |
| C19-GS <sub>min</sub>                   | 0.215  | -514                                | 201                                        | 411                                   | 145                                          |
| O7-AA-GS                                | 0.209  | -474                                | 188                                        | 397                                   | 141                                          |
| O3-GS <sub>min</sub>                    | 0.209  | -460                                | 183                                        | 380                                   | 135                                          |
| O3C18GS                                 | 0.208  | -459                                | 183                                        | 413                                   | 149                                          |
| MR ( $\text{m}^3/\text{mol}$ )          | 0.205  | 84                                  | 34                                         | -1415                                 | 588                                          |
| C18-GS-O3                               | 0.201  | -409                                | 166                                        | 367                                   | 133                                          |
| AA-GS-O7                                | 0.187  | -442                                | 188                                        | 366                                   | 138                                          |
| O7-GS <sub>min</sub>                    | 0.183  | -437                                | 189                                        | 363                                   | 139                                          |
| O7AAC20                                 | 0.179  | -699                                | 305                                        | 645                                   | 263                                          |
| brotN                                   | 0.179  | 57.1                                | 25                                         | -682                                  | 320                                          |
| BC-GS <sub>min</sub>                    | 0.178  | -419                                | 184                                        | 346                                   | 134                                          |
| O3-AA-GS                                | 0.168  | -432                                | 196                                        | 366                                   | 148                                          |
| O7-GS                                   | 0.160  | -415                                | 194                                        | 341                                   | 140                                          |
| GS-O7-C18                               | 0.160  | -463                                | 217                                        | 414                                   | 174                                          |
| AA-GS-O3                                | 0.160  | -434                                | 203                                        | 371                                   | 154                                          |
| O3-GS                                   | 0.160  | -418                                | 196                                        | 342                                   | 141                                          |
| C18-GS <sub>min</sub>                   | 0.158  | -448                                | 211                                        | 367                                   | 154                                          |
| O7-AA                                   | 0.155  | -664                                | 316                                        | 613                                   | 271                                          |
| C19-GS                                  | 0.149  | -450                                | 219                                        | 359                                   | 155                                          |
| BC-GS                                   | 0.146  | -395                                | 195                                        | 319                                   | 137                                          |
| GS-O3-C18                               | 0.146  | -505                                | 249                                        | 460                                   | 206                                          |
| GS-O3-C19                               | 0.139  | -636                                | 323                                        | 551                                   | 257                                          |
| GS-O7-C19                               | 0.135  | -615                                | 317                                        | 528                                   | 250                                          |
| C18-GS                                  | 0.131  | -389                                | 204                                        | 314                                   | 143                                          |
| O7-GS <sub>max</sub>                    | 0.120  | -352                                | 195                                        | 281                                   | 133                                          |
| O3-GS <sub>max</sub>                    | 0.116  | -376                                | 213                                        | 294                                   | 142                                          |
| BC-GS <sub>max</sub>                    | 0.112  | -353                                | 203                                        | 277                                   | 135                                          |
| O3-AA-C20                               | 0.109  | -439                                | 256                                        | 424                                   | 222                                          |
| SASA <sub>side</sub> ( $\text{\AA}^2$ ) | 0.107  | 0.890                               | 0.52                                       | -445                                  | 291                                          |
| C19-GS <sub>max</sub>                   | 0.0940 | -363                                | 230                                        | 283                                   | 152                                          |
| KierFlex                                | 0.0919 | 91.2                                | 58                                         | -791                                  | 538                                          |
| C18-AA                                  | 0.0882 | -478                                | 314                                        | 450                                   | 266                                          |
| C18-GS <sub>max</sub>                   | 0.0878 | -307                                | 202                                        | 239                                   | 130                                          |

|                                        |          |          |      |       |     |
|----------------------------------------|----------|----------|------|-------|-----|
| GS-O3-AA                               | 0.0836   | 439      | 297  | -273  | 218 |
| O3-AA-C19                              | 0.0815   | -413     | 283  | 393   | 239 |
| O3-AA-C18                              | 0.0727   | -393     | 286  | 370   | 238 |
| C19-AA                                 | 0.0717   | -381     | 280  | 361   | 233 |
| BC-AA                                  | 0.0688   | -382     | 287  | 367   | 242 |
| C19-GS-O7                              | 0.0440   | -276     | 262  | 256   | 201 |
| O3-AA                                  | 0.0429   | -307     | 296  | 309   | 254 |
| GS-O7-AA                               | 0.0232   | 280      | 370  | -163  | 279 |
| O7-AA-C19                              | 0.0196   | -196     | 283  | 213   | 242 |
| HD                                     | 0.0134   | -43.0    | 75   | 227   | 317 |
| O3-AA-BC                               | 0.0109   | -154     | 299  | 176   | 253 |
| SASA ( $\text{\AA}^2$ )                | 7.75E-03 | 0.225    | 0.52 | -174  | 510 |
| PSA <sub>side</sub> ( $\text{\AA}^2$ ) | 5.26E-03 | 0.382    | 1.1  | -27.8 | 212 |
| PSA ( $\text{\AA}^2$ )                 | 2.44E-09 | 0.000258 | 1.1  | 46.7  | 289 |

<sup>a</sup> Regression analysis of structural descriptors (e.g. C18-GS-O7) employed the overlap coefficients with respect to **13**.

<sup>b</sup> Coefficient of independent variable has units of  $\mu\text{M}$  divided by units of the molecular descriptor (e.g.  $\mu\text{M}/\text{\AA}^2$  for SASA).

**Table S5.** Results from single-variable regression of molecular descriptors against  $K_m$  for Set 2.<sup>a</sup>

| Molecular Descriptor                    | $r^2$   | Coeff of indep variable <sup>b</sup> | SEM of coeff of indep variable <sup>b</sup> | coeff of intercept ( $\mu\text{M}$ ) | SEM of coeff of intercept ( $\mu\text{M}$ ) |
|-----------------------------------------|---------|--------------------------------------|---------------------------------------------|--------------------------------------|---------------------------------------------|
| HD                                      | 0.579   | 9.23                                 | 1.7                                         | -34.0                                | 7.1                                         |
| SASA <sub>side</sub> ( $\text{\AA}^2$ ) | 0.294   | 0.0568                               | 0.019                                       | -26.2                                | 10                                          |
| logP                                    | 0.162   | -2.64                                | 1.3                                         | 8.13                                 | 1.9                                         |
| HA                                      | 0.143   | 2.66                                 | 1.4                                         | -12.7                                | 9.2                                         |
| SASA ( $\text{\AA}^2$ )                 | 0.132   | 0.0367                               | 0.020                                       | -31.1                                | 20                                          |
| O7-C18-GS                               | 0.114   | -15.3                                | 9.1                                         | 17.3                                 | 7.5                                         |
| O7-C19-GS                               | 0.106   | -16.5                                | 10                                          | 18.0                                 | 8.3                                         |
| GS-O7-AA                                | 0.0876  | -18.2                                | 13                                          | 18.4                                 | 9.4                                         |
| GS-O7-C18                               | 0.0857  | -13.6                                | 9.5                                         | 15.7                                 | 7.7                                         |
| O3-C19-GS                               | 0.0835  | -14.1                                | 9.9                                         | 16.3                                 | 8.2                                         |
| O3-C18-GS                               | 0.0786  | -12.0                                | 8.8                                         | 14.6                                 | 7.2                                         |
| KierFlex                                | 0.0707  | 2.97                                 | 2.3                                         | -22.4                                | 21                                          |
| MR ( $\text{m}^3/\text{mol}$ )          | 0.0686  | 2.33                                 | 1.8                                         | -35.5                                | 32                                          |
| $\Delta G_w$ (kcal/mol)                 | 0.0593  | -0.341                               | 0.29                                        | -21.6                                | 22                                          |
| brotN                                   | 0.0562  | 1.29                                 | 1.1                                         | -11.5                                | 14                                          |
| GS-O3-C18                               | 0.0507  | -11.9                                | 11                                          | 14.7                                 | 9.2                                         |
| C19-GS-O3                               | 0.0488  | -9.79                                | 9.2                                         | 12.7                                 | 7.5                                         |
| O7-AA-GS                                | 0.0455  | -9.35                                | 9.1                                         | 11.9                                 | 7.0                                         |
| O7-GS <sub>min</sub>                    | 0.0422  | -8.63                                | 8.8                                         | 11.2                                 | 6.6                                         |
| BC-GS <sub>min</sub>                    | 0.0413  | -7.94                                | 8.2                                         | 10.6                                 | 6.0                                         |
| O3-GS <sub>max</sub>                    | 0.0358  | -7.96                                | 8.8                                         | 10.1                                 | 6.0                                         |
| O3-AA-GS                                | 0.0348  | -7.83                                | 8.8                                         | 10.7                                 | 6.7                                         |
| BC-GS                                   | 0.0323  | -7.10                                | 8.3                                         | 9.80                                 | 5.9                                         |
| GS-O7-C19                               | 0.0322  | -10.8                                | 13                                          | 13.4                                 | 10                                          |
| O3-AA-BC                                | 0.0318  | -8.59                                | 10                                          | 12.0                                 | 8.6                                         |
| O3-GS <sub>min</sub>                    | 0.0317  | -7.20                                | 8.5                                         | 10.1                                 | 6.4                                         |
| O3-GS                                   | 0.0310  | -7.31                                | 8.7                                         | 10.1                                 | 6.4                                         |
| O7-GS                                   | 0.0297  | -7.28                                | 8.9                                         | 10.1                                 | 6.5                                         |
| O3-AA                                   | 0.0295  | -8.72                                | 11                                          | 12.3                                 | 9.2                                         |
| C18-GS-O3                               | 0.0278  | -6.11                                | 7.7                                         | 9.69                                 | 6.3                                         |
| BC-GS <sub>max</sub>                    | 0.0227  | -5.87                                | 8.2                                         | 8.70                                 | 5.6                                         |
| O3-AA-C18                               | 0.0216  | -7.25                                | 10                                          | 10.8                                 | 8.7                                         |
| MW                                      | 0.0211  | 0.0353                               | 0.051                                       | -17.3                                | 32                                          |
| GS-O3-AA                                | 0.0193  | -7.45                                | 11                                          | 10.2                                 | 8.2                                         |
| O3-AA-C19                               | 0.0169  | -6.54                                | 11                                          | 10.3                                 | 9.0                                         |
| C18-GS                                  | 0.0166  | -5.10                                | 8.4                                         | 8.36                                 | 5.9                                         |
| O3-AA-C20                               | 0.0163  | -6.33                                | 10                                          | 10.3                                 | 9.2                                         |
| C18-GS <sub>min</sub>                   | 0.0152  | -5.29                                | 9.1                                         | 8.66                                 | 6.7                                         |
| C19-GS <sub>max</sub>                   | 0.0148  | -5.15                                | 9.0                                         | 8.20                                 | 6.0                                         |
| C19-GS                                  | 0.0138  | -5.13                                | 9.3                                         | 8.43                                 | 6.6                                         |
| O7-GS <sub>max</sub>                    | 0.0135  | -4.52                                | 8.2                                         | 7.87                                 | 5.7                                         |
| C19-GS <sub>min</sub>                   | 0.0131  | -4.99                                | 9.2                                         | 8.42                                 | 6.8                                         |
| C18-GS <sub>max</sub>                   | 0.0114  | -3.91                                | 7.8                                         | 7.29                                 | 5.1                                         |
| GS-O3-C19                               | 0.00919 | -5.84                                | 13                                          | 9.48                                 | 10                                          |

|                                        |          |         |       |      |     |
|----------------------------------------|----------|---------|-------|------|-----|
| O7-AA                                  | 0.00840  | -5.71   | 13    | 9.72 | 11  |
| O7-AA-C20                              | 0.00834  | -5.62   | 13    | 9.67 | 11  |
| BC-AA                                  | 0.00671  | -4.01   | 10    | 8.19 | 8.9 |
| AA-GS-O3                               | 0.00521  | 3.05    | 9.0   | 2.48 | 6.9 |
| PSA ( $\text{\AA}^2$ )                 | 0.00471  | -0.0116 | 0.036 | 7.92 | 9.7 |
| C18-GS-O7                              | 0.00463  | 3.10    | 9.7   | 2.33 | 7.8 |
| O7-AA-C19                              | 0.00369  | -2.84   | 10    | 7.22 | 8.6 |
| O7-AA-BC                               | 0.00263  | -2.71   | 11    | 7.17 | 9.9 |
| AA-GS-O7                               | 0.00182  | -1.75   | 8.7   | 6.09 | 6.5 |
| C18-AA                                 | 0.00179  | -2.34   | 12    | 6.79 | 10  |
| O7-AA-C18                              | 0.00126  | -1.89   | 11    | 6.39 | 9.6 |
| PSA <sub>side</sub> ( $\text{\AA}^2$ ) | 4.93E-05 | 0.00121 | 0.037 | 4.56 | 7.2 |
| C19-GS-O7                              | 1.14E-05 | 0.155   | 9.8   | 4.68 | 7.5 |
| C19-AA                                 | 7.47E-06 | -0.131  | 10    | 4.91 | 8.6 |

<sup>a</sup> Regression analysis of structural descriptors (e.g. C18-GS-O7) employed the overlap coefficients with respect to **13**.

<sup>b</sup> Coefficient of independent variable has units of  $\mu\text{M}$  divided by units of the molecular descriptor (e.g.  $\mu\text{M}/\text{\AA}^2$  for SASA).

**Table S6.** Results from single-variable regression of molecular descriptors against  $K_m/\text{norm}V_{\text{max}}$  for **Set 1**.<sup>a</sup>

| <b>Molecular Descriptor</b> | $r^2$  | <b>Coeff of indep variable<sup>b</sup></b> | <b>SEM of coeff of indep variable<sup>b</sup></b> | <b>Coeff of intercept (<math>\mu\text{M}</math>)</b> | <b>SEM of coeff of intercept (<math>\mu\text{M}</math>)</b> |
|-----------------------------|--------|--------------------------------------------|---------------------------------------------------|------------------------------------------------------|-------------------------------------------------------------|
| $\Delta G_w$ (kcal/mol)     | 0.902  | -10.5                                      | 0.71                                              | -788                                                 | 58                                                          |
| logP                        | 0.590  | -98.5                                      | 17                                                | 164                                                  | 30                                                          |
| C19-GS-O3                   | 0.466  | -894                                       | 195                                               | 762                                                  | 156                                                         |
| O7-C19-GS                   | 0.438  | -1003                                      | 232                                               | 846                                                  | 184                                                         |
| O7-C18-GS                   | 0.424  | -848                                       | 202                                               | 739                                                  | 164                                                         |
| C18-GS-O7                   | 0.387  | -850                                       | 218                                               | 721                                                  | 172                                                         |
| O3-C18-GS                   | 0.362  | -790                                       | 214                                               | 692                                                  | 174                                                         |
| O7-AA-GS                    | 0.354  | -804                                       | 222                                               | 655                                                  | 167                                                         |
| O3-GS <sub>min</sub>        | 0.324  | -747                                       | 220                                               | 603                                                  | 163                                                         |
| C18-GS-O3                   | 0.320  | -673                                       | 200                                               | 587                                                  | 160                                                         |
| O7-GS <sub>min</sub>        | 0.316  | -750                                       | 225                                               | 604                                                  | 166                                                         |
| C19-GS <sub>min</sub>       | 0.306  | -801                                       | 246                                               | 629                                                  | 178                                                         |
| O7-AA-C18                   | 0.298  | -984                                       | 308                                               | 873                                                  | 257                                                         |
| AA-GS-O7                    | 0.298  | -727                                       | 228                                               | 586                                                  | 168                                                         |
| GS-O7-C18                   | 0.292  | -816                                       | 260                                               | 708                                                  | 208                                                         |
| O7-GS                       | 0.288  | -727                                       | 233                                               | 575                                                  | 168                                                         |
| O3-AA-GS                    | 0.287  | -738                                       | 237                                               | 606                                                  | 178                                                         |
| BC-GS <sub>min</sub>        | 0.286  | -694                                       | 224                                               | 557                                                  | 163                                                         |
| O3-C19-GS                   | 0.281  | -902                                       | 295                                               | 786                                                  | 239                                                         |
| O3-GS                       | 0.277  | -718                                       | 237                                               | 567                                                  | 170                                                         |
| GS-O3-C18                   | 0.273  | -901                                       | 301                                               | 797                                                  | 248                                                         |
| AA-GS-O3                    | 0.251  | -709                                       | 250                                               | 591                                                  | 190                                                         |
| O7-AA-C20                   | 0.247  | -1071                                      | 382                                               | 979                                                  | 329                                                         |
| C18-GS <sub>min</sub>       | 0.247  | -731                                       | 260                                               | 584                                                  | 190                                                         |
| BC-GS                       | 0.244  | -665                                       | 239                                               | 520                                                  | 169                                                         |
| O7-AA-BC                    | 0.234  | -904                                       | 334                                               | 837                                                  | 289                                                         |
| C19-GS                      | 0.230  | -729                                       | 273                                               | 567                                                  | 192                                                         |
| O7-AA                       | 0.227  | -1047                                      | 395                                               | 953                                                  | 338                                                         |
| O7-GS <sub>max</sub>        | 0.218  | -619                                       | 240                                               | 474                                                  | 163                                                         |
| HA                          | 0.213  | 114                                        | 45                                                | -703                                                 | 302                                                         |
| O3-GS <sub>max</sub>        | 0.213  | -667                                       | 262                                               | 498                                                  | 175                                                         |
| O3-AA-C20                   | 0.203  | -781                                       | 316                                               | 732                                                  | 274                                                         |
| C18-GS                      | 0.202  | -630                                       | 255                                               | 493                                                  | 179                                                         |
| GS-O7-C19                   | 0.197  | -968                                       | 399                                               | 818                                                  | 314                                                         |
| BC-GS <sub>max</sub>        | 0.191  | -602                                       | 253                                               | 454                                                  | 169                                                         |
| GS-O3-C19                   | 0.187  | -961                                       | 409                                               | 823                                                  | 326                                                         |
| C19-GS <sub>max</sub>       | 0.154  | -606                                       | 290                                               | 455                                                  | 192                                                         |
| C18-GS <sub>max</sub>       | 0.138  | -504                                       | 257                                               | 376                                                  | 165                                                         |
| O3-AA-C19                   | 0.124  | -667                                       | 361                                               | 619                                                  | 304                                                         |
| O3-AA-C18                   | 0.0989 | -598                                       | 368                                               | 553                                                  | 306                                                         |
| O3-AA                       | 0.0871 | -571                                       | 378                                               | 548                                                  | 324                                                         |
| C19-GS-O7                   | 0.0861 | -503                                       | 335                                               | 443                                                  | 257                                                         |
| BC-AA                       | 0.0816 | -543                                       | 372                                               | 517                                                  | 314                                                         |
| C18-AA                      | 0.0528 | -483                                       | 418                                               | 468                                                  | 354                                                         |
| C19-AA                      | 0.0522 | -425                                       | 369                                               | 411                                                  | 307                                                         |



|                                        |          |        |      |       |     |
|----------------------------------------|----------|--------|------|-------|-----|
| SASA <sub>side</sub> (Å <sup>2</sup> ) | 0.0421   | 0.729  | 0.71 | -342  | 394 |
| GS-O3-AA                               | 0.0356   | 374    | 397  | -211  | 292 |
| O3-AA-BC                               | 0.0232   | -293   | 388  | 307   | 328 |
| KierFlex                               | 0.0199   | -44.6  | 64   | 478   | 599 |
| MR (m <sup>3</sup> /mol)               | 0.0170   | -24.0  | 37   | 483   | 656 |
| PSA <sub>side</sub> (Å <sup>2</sup> )  | 0.0127   | 0.773  | 1.4  | -90   | 275 |
| brotN                                  | 0.00691  | -11.8  | 29   | 216   | 381 |
| SASA (Å <sup>2</sup> )                 | 0.00637  | -0.267 | 0.68 | 322   | 667 |
| MW                                     | 0.00604  | -0.449 | 1.2  | 349   | 756 |
| GS-O7-AA                               | 0.00508  | 171    | 488  | -67.0 | 367 |
| O7-AA-C19                              | 0.00480  | -127   | 373  | 168   | 318 |
| HD                                     | 0.00371  | -29.5  | 99   | 185   | 416 |
| PSA (Å <sup>2</sup> )                  | 1.07E-04 | 0.0703 | 1.4  | 41.9  | 377 |

<sup>a</sup> Regression analysis of structural descriptors (e.g. C18-GS-O7) employed the overlap coefficients with respect to **13**.

<sup>b</sup> Coefficient of independent variable has units of μM divided by units of the molecular descriptor (e.g. μM/Å<sup>2</sup> for SASA).

**Table S7.** Results from single-variable regression of molecular descriptors against  $K_m/\text{norm}V_{\text{max}}$  for **Set 2**.<sup>a</sup>

| Molecular Descriptor                    | $r^2$   | Coeff of indep variable <sup>b</sup> | SEM of coeff of indep variable <sup>b</sup> | Coeff of intercept ( $\mu\text{M}$ ) | SEM of coeff of intercept ( $\mu\text{M}$ ) |
|-----------------------------------------|---------|--------------------------------------|---------------------------------------------|--------------------------------------|---------------------------------------------|
| HD                                      | 0.598   | 32.8                                 | 5.7                                         | -127                                 | 24                                          |
| SASA <sub>side</sub> ( $\text{\AA}^2$ ) | 0.525   | 0.265                                | 0.054                                       | -134                                 | 30                                          |
| O7-C19-GS                               | 0.209   | -81.3                                | 34                                          | 76.1                                 | 27                                          |
| O7-C18-GS                               | 0.203   | -71.5                                | 30                                          | 69.5                                 | 25                                          |
| SASA ( $\text{\AA}^2$ )                 | 0.184   | 0.152                                | 0.068                                       | -138                                 | 67                                          |
| O3-C19-GS                               | 0.176   | -71.6                                | 33                                          | 69.7                                 | 27                                          |
| O3-C18-GS                               | 0.160   | -59.9                                | 29                                          | 59.9                                 | 24                                          |
| GS-O7-C18                               | 0.155   | -63.9                                | 32                                          | 62.5                                 | 26                                          |
| C19-GS-O3                               | 0.151   | -60.2                                | 30                                          | 59.6                                 | 25                                          |
| O7-AA-GS                                | 0.0890  | -45.8                                | 31                                          | 45.6                                 | 24                                          |
| GS-O3-C18                               | 0.0814  | -53.0                                | 38                                          | 54.9                                 | 32                                          |
| O7-GS <sub>min</sub>                    | 0.0775  | -40.9                                | 30                                          | 41.3                                 | 23                                          |
| C18-GS-O3                               | 0.0754  | -35.2                                | 26                                          | 39.3                                 | 21                                          |
| HA                                      | 0.0727  | 6.62                                 | 5.0                                         | -32.5                                | 33                                          |
| O3-AA-GS                                | 0.0691  | -38.7                                | 30                                          | 40.2                                 | 23                                          |
| O3-AA-C20                               | 0.0685  | -45.4                                | 36                                          | 50.5                                 | 31                                          |
| O3-AA                                   | 0.0647  | -45.2                                | 37                                          | 49.8                                 | 32                                          |
| O3-GS <sub>min</sub>                    | 0.0635  | -35.7                                | 29                                          | 37.6                                 | 22                                          |
| GS-O7-C19                               | 0.0629  | -52.9                                | 44                                          | 52.9                                 | 35                                          |
| BC-GS <sub>min</sub>                    | 0.0612  | -33.8                                | 28                                          | 35.8                                 | 21                                          |
| logP                                    | 0.0550  | -5.39                                | 4.8                                         | 17.8                                 | 7.0                                         |
| O3-AA-BC                                | 0.0520  | -38.5                                | 35                                          | 43.4                                 | 30                                          |
| O3-GS                                   | 0.0506  | -32.7                                | 30                                          | 34.6                                 | 22                                          |
| O3-AA-C18                               | 0.0467  | -37.3                                | 36                                          | 42.1                                 | 30                                          |
| O7-GS                                   | 0.0432  | -30.7                                | 31                                          | 33.3                                 | 23                                          |
| O3-GS <sub>max</sub>                    | 0.0407  | -29.7                                | 31                                          | 30.9                                 | 21                                          |
| O7-AA-C20                               | 0.0396  | -42.8                                | 45                                          | 48.2                                 | 39                                          |
| BC-GS                                   | 0.0383  | -27.1                                | 29                                          | 30.1                                 | 21                                          |
| O7-AA                                   | 0.0360  | -41.3                                | 46                                          | 46.7                                 | 39                                          |
| GS-O3-C19                               | 0.0353  | -40.0                                | 45                                          | 43.1                                 | 36                                          |
| C19-GS <sub>min</sub>                   | 0.0251  | -24.2                                | 32                                          | 28.6                                 | 24                                          |
| BC-AA                                   | 0.0229  | -25.9                                | 36                                          | 33.0                                 | 31                                          |
| BC-GS <sub>max</sub>                    | 0.0216  | -20.1                                | 29                                          | 24.4                                 | 19                                          |
| C19-GS                                  | 0.0214  | -22.4                                | 32                                          | 26.9                                 | 23                                          |
| O3-AA-C19                               | 0.0200  | -24.9                                | 37                                          | 32.1                                 | 32                                          |
| C18-GS <sub>min</sub>                   | 0.0199  | -21.2                                | 32                                          | 26.5                                 | 23                                          |
| O7-AA-BC                                | 0.0198  | -26.0                                | 39                                          | 33.8                                 | 34                                          |
| GS-O7-AA                                | 0.0196  | -30.2                                | 45                                          | 33.5                                 | 34                                          |
| O7-GS <sub>max</sub>                    | 0.0182  | -18.4                                | 29                                          | 23.5                                 | 20                                          |
| C18-GS-O7                               | 0.0181  | 21.5                                 | 34                                          | -6.07                                | 27                                          |
| $\Delta G_w$ (kcal/mol)                 | 0.0142  | -0.585                               | 1.0                                         | -34.1                                | 80                                          |
| C19-GS <sub>max</sub>                   | 0.0111  | -15.6                                | 31                                          | 21.4                                 | 21                                          |
| C18-GS                                  | 0.0110  | -14.5                                | 29                                          | 21.2                                 | 21                                          |
| O7-AA-C18                               | 0.0109  | -19.5                                | 40                                          | 27.5                                 | 33                                          |
| PSA ( $\text{\AA}^2$ )                  | 0.00917 | -0.0566                              | 0.13                                        | 26.3                                 | 34                                          |

|                                       |          |         |      |        |    |
|---------------------------------------|----------|---------|------|--------|----|
| AA-GS-O7                              | 0.00791  | -12.8   | 31   | 20.5   | 23 |
| C18-AA                                | 0.00498  | -13.7   | 41   | 22.7   | 35 |
| C19-GS-O7                             | 0.00495  | 11.3    | 34   | 2.42   | 26 |
| C19-AA                                | 0.00477  | -11.6   | 36   | 20.7   | 30 |
| C18-GS <sub>max</sub>                 | 0.00476  | -8.85   | 27   | 16.7   | 18 |
| O7-AA-C19                             | 0.00474  | -11.3   | 35   | 20.7   | 30 |
| MR (m <sup>3</sup> /mol)              | 0.00264  | 0.835   | 3.5  | -3.71  | 61 |
| KierFlex                              | 0.00205  | 1.27    | 6.0  | -0.880 | 56 |
| AA-GS-O3                              | 0.00161  | 5.92    | 31   | 6.55   | 24 |
| MW                                    | 9.27E-04 | -0.0155 | 0.11 | 21.0   | 70 |
| PSA <sub>side</sub> (Å <sup>2</sup> ) | 1.20E-04 | 0.00660 | 0.13 | 9.77   | 25 |
| GS-O3-AA                              | 1.67E-05 | 0.765   | 40   | 10.5   | 29 |
| brotN                                 | 1.85E-08 | 0.00170 | 2.7  | 11.0   | 35 |

<sup>a</sup> Regression analysis of structural descriptors (e.g. C18-GS-O7) employed the overlap coefficients with respect to **13**.

<sup>b</sup> Coefficient of independent variable has units of  $\mu\text{M}$  divided by units of the molecular descriptor (e.g.  $\mu\text{M}/\text{\AA}^2$  for SASA).

**Table S8.** Observed and predicted  $K_m$  values of anilinylyl conjugated in **Set 1** and **Set 2** (using the best model in respective set).

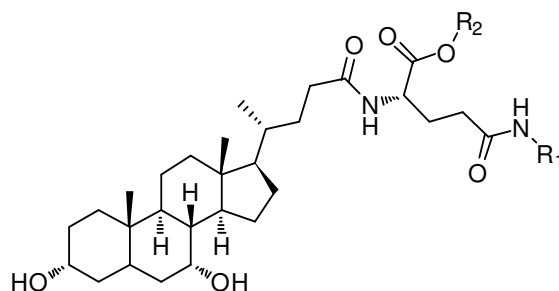

| Compound | R <sub>1</sub> | R <sub>2</sub> | Observed $K_m$ ( $\mu\text{M}$ ) <sup>a</sup> | Predicted $K_m$ by Model 1 for Set 1 ( $\mu\text{M}$ ) | Predicted $K_m$ by Model 1 for Set 2 ( $\mu\text{M}$ ) |
|----------|----------------|----------------|-----------------------------------------------|--------------------------------------------------------|--------------------------------------------------------|
| 1        |                | H              | $0.823 \pm 0.320$                             | -17.6                                                  | -0.241                                                 |
| 2        |                | H              | $0.100^a \pm 0.773$                           | 25.5                                                   | 2.13                                                   |
| 3        |                | H              | $2.22 \pm 1.71$                               | 6.55                                                   | 0.638                                                  |
| 4        |                | H              | $1.11 \pm 0.35$                               | -11.3                                                  | 1.34                                                   |
| 5        |                | H              | $0.450 \pm 0.611$                             | -64.8                                                  | -1.12                                                  |
| 6        |                | H              | $0.100^a \pm 0.330$                           | 15.0                                                   | 3.00                                                   |

|    |                                                                                     |   |                     |       |       |
|----|-------------------------------------------------------------------------------------|---|---------------------|-------|-------|
| 7  | 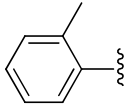   | H | $1.69 \pm 0.71$     | -65.7 | 3.58  |
| 8  |    | H | $0.919 \pm 0.622$   | 22.0  | 1.97  |
| 9  |    | H | $0.100^a \pm 0.500$ | -7.50 | 1.43  |
| 10 |    | H | $3.87 \pm 0.55$     | 34.9  | 4.68  |
| 11 |    | H | $1.21 \pm 0.58$     | 12.9  | 3.36  |
| 12 |  | H | $6.56 \pm 0.98$     | 28.7  | 3.16  |
| 13 |  | H | $0.100^a \pm 5.302$ | 78.6  | 0.965 |
| 14 |  | H | $3.42 \pm 1.23$     | 32.5  | 3.51  |
| 15 |  | H | $7.27 \pm 2.80$     | 15.5  | 7.61  |
| 16 |  | H | $2.54 \pm 0.69$     | 30.3  | 4.19  |

|    |                                                                                     |   |                   |       |        |
|----|-------------------------------------------------------------------------------------|---|-------------------|-------|--------|
| 17 | 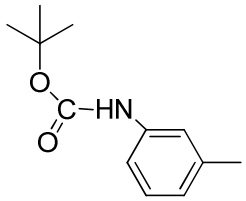   | H | $10.3 \pm 3.1$    | 75.8  | 12.8   |
| 18 |    | H | $17.5 \pm 4.7$    | -18.5 | 15.9   |
| 19 |    | H | $9.89 \pm 1.15$   | -42.0 | 8.45   |
| 20 |    | H | $14.9 \pm 1.2$    | 26.9  | 12.2   |
| 21 |   | H | $7.91 \pm 1.94$   | 18.6  | 11.3   |
| 22 |  | H | $0.549 \pm 0.240$ | -51.9 | -0.826 |
| 23 |  | H | $7.82 \pm 2.06$   | 5.85  | 3.78   |
| 24 |  | H | $2.53 \pm 0.48$   | 52.9  | 4.09   |
| 25 |  | H | $11.4 \pm 1.5$    | 76.8  | 8.40   |
| 26 |  |   | $495 \pm 222$     | 401   | N/A    |

27

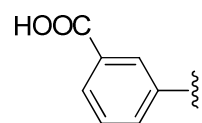

H

$607 \pm 476$

614

N/A

---

**Table S9.** Observed and predicted  $K_m/\text{norm}V_{\text{max}}$  values of anilinylyl conjugated in **Set 1** and **Set 2** (using the best model in respective set).

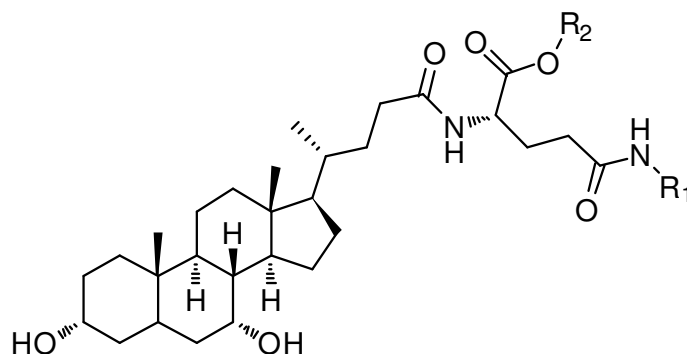

| Compound | R <sub>1</sub> | R <sub>2</sub> | Observed $K_m/\text{norm}V_{\text{max}}$<br>$x$ ( $\mu\text{M}$ ) <sup>a</sup> | Predicted $K_m/\text{norm}V_{\text{max}}$<br>by Model 1<br>for Set 1 ( $\mu\text{M}$ ) | Predicted $K_m/\text{norm}V_{\text{max}}$<br>by Model 1<br>for Set 2 ( $\mu\text{M}$ ) |
|----------|----------------|----------------|--------------------------------------------------------------------------------|----------------------------------------------------------------------------------------|----------------------------------------------------------------------------------------|
| 1        |                | H              | 0.690                                                                          | -6.42                                                                                  | -5.02                                                                                  |
| 2        |                | H              | 0.0662                                                                         | -16.3                                                                                  | 0.212                                                                                  |
| 3        |                | H              | 1.71                                                                           | -20.9                                                                                  | 6.57                                                                                   |
| 4        |                | H              | 1.10                                                                           | 15.5                                                                                   | 1.30                                                                                   |
| 5        |                | H              | 0.658                                                                          | -36.7                                                                                  | 3.09                                                                                   |
| 6        |                | H              | 0.0917                                                                         | -12.77                                                                                 | -1.64                                                                                  |



|    |                                                                                     |   |        |       |       |
|----|-------------------------------------------------------------------------------------|---|--------|-------|-------|
| 7  | 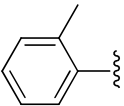   | H | 0.980  | -29.1 | 1.47  |
| 8  |    | H | 0.885  | 41.5  | 3.33  |
| 9  |    | H | 0.0676 | -7.92 | 0.431 |
| 10 |    | H | 3.95   | 33.6  | 7.02  |
| 11 |    | H | 2.19   | 7.16  | 4.70  |
| 12 |  | H | 7.25   | 10.4  | 4.47  |
| 13 |  | H | 0.0431 | 98.1  | 14.7  |
| 14 |  | H | 9.09   | -14.4 | 8.14  |
| 15 |  | H | 4.95   | 0.450 | 5.20  |
| 16 |  | H | 3.18   | 8.15  | 7.36  |

|    |                                                                                     |                                                                                     |       |       |      |
|----|-------------------------------------------------------------------------------------|-------------------------------------------------------------------------------------|-------|-------|------|
| 17 | 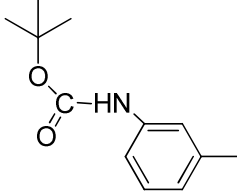   | H                                                                                   | 50.8  | 106   | 52.8 |
| 18 |    | H                                                                                   | 69.9  | 60.0  | 68.5 |
| 19 |    | H                                                                                   | 13.0  | -29.4 | 20.3 |
| 20 |    | H                                                                                   | 27.9  | 102   | 18.1 |
| 21 |   | H                                                                                   | 23.6  | 61.8  | 25.5 |
| 22 |  | H                                                                                   | 0.513 | -15.3 | 3.38 |
| 23 |  | H                                                                                   | 14.3  | -7.02 | 5.50 |
| 24 |  | H                                                                                   | 2.56  | 33.1  | 6.93 |
| 25 |  | H                                                                                   | 25.8  | 43.7  | 17.7 |
| 26 |  |  | 369   | 315   | N/A  |

27

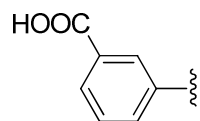

H

952

944

N/A

---

**Table S10.** Results from multivariable regression and AIC<sub>C</sub> analysis for the selected CSP-SAR models for log(K<sub>m</sub>) for **Set 1**.<sup>a</sup>

| CSP-SAR Models                      | $r^2$ | $Q^2$ | $F$  | $W_i$ | $K$          | $A$ (m <sup>-3</sup> . mol) | $B$            | $C$          | $D$           | Standardized $A$ (m <sup>-3</sup> . mol) | Standardized $B$ | Standardized $C$ | Standardized $D$ |
|-------------------------------------|-------|-------|------|-------|--------------|-----------------------------|----------------|--------------|---------------|------------------------------------------|------------------|------------------|------------------|
| MR, logP, HD, C18-GS <sub>max</sub> | 0.837 | 0.749 | 26.9 | 18.3  | - 15.4 ± 2.0 | 0.835 ± 0.10                | -0.310 ± 0.057 | 0.701 ± 0.21 | - 1.91 ± 0.60 | 0.724                                    | -0.508           | 0.303            | -0.296           |
| MR, logP, HD, BC-GS <sub>max</sub>  | 0.832 | 0.733 | 26.1 | 12.9  | - 15.4 ± 2.1 | 0.842 ± 0.11                | -0.302 ± 0.058 | 0.674 ± 0.21 | - 1.94 ± 0.64 | 0.730                                    | -0.496           | 0.292            | -0.294           |

<sup>a</sup>  $A$ ,  $B$ ,  $C$  and  $D$  represent the coefficient of the independent variables (molecular descriptors);  $K$  represents the coefficient of the intercept. **Set 1** includes all compounds that were substrates.

**Table S11.** Results from multivariable regression and AIC<sub>C</sub> analysis for the selected CSP-SAR models for log(K<sub>m</sub>) for **Set 2**.<sup>a</sup>

| CSP-SAR Models                                  | $r^2$ | $Q^2$ | $F$  | $W_i$ | $K$          | $A$          | $B$                                         | $C$            | $D$           | Standardized $A$ | Standardized $B$                  | Standardized $C$ | Standardized $D$ |
|-------------------------------------------------|-------|-------|------|-------|--------------|--------------|---------------------------------------------|----------------|---------------|------------------|-----------------------------------|------------------|------------------|
| HD, ΔG <sub>w</sub> , MW, C18-GS <sub>max</sub> | 0.730 | 0.489 | 10.2 | 4.61  | - 24.2 ± 4.6 | 0.811 ± 0.23 | - 0.0999 ± 0.030 (kcal <sup>-1</sup> . mol) | 0.023 ± 0.0053 | - 1.98 ± 0.86 | 0.490            | -0.522 (kcal <sup>-1</sup> . mol) | 0.707            | -0.344           |
| HD, KierFlex, O7-GS <sub>max</sub> , C19-GS-O3  | 0.729 | 0.578 | 12.8 | 4.44  | - 14.0 ± 2.2 | 1.19 ± 0.21  | 0.970 ± 0.20                                | - 4.26 ± 1.1   | 4.14 ± 1.2    | 0.721            | 0.635                             | -0.805           | 0.688            |

<sup>a</sup>  $A$ ,  $B$ ,  $C$  and  $D$  represent the coefficient of the independent variables (molecular descriptors);  $K$  represents the coefficient of the intercept. **Set 2** includes all compounds that were substrates excluding 26 and 27.

**Table S12.** Results from multivariable regression and AIC<sub>C</sub> analysis for the selected CSP-SAR models for log(K<sub>m</sub>/normV<sub>max</sub>) for **Set 1**.<sup>a</sup>

| CSP-SAR Models                   | $r^2$ | $Q^2$ | $F$  | $W_i$ | $K$             | $A$                | $B$                                      | $C$                                      | $D$             | Standardized<br>$A$ | Standardized<br>$B$      | Standardized<br>$C$      | Standardized<br>$D$ |
|----------------------------------|-------|-------|------|-------|-----------------|--------------------|------------------------------------------|------------------------------------------|-----------------|---------------------|--------------------------|--------------------------|---------------------|
| logP, SASA, O7-GS <sub>max</sub> | 0.757 | 0.631 | 22.8 | 7.12  | - 12.1<br>± 2.1 | - 0.361 ±<br>0.078 | 0.0164 ±<br>0.0025<br>(Å <sup>-2</sup> ) | - 4.54 ±<br>1.0                          | N/A             | -0.525              | 0.918 (Å <sup>-2</sup> ) | -0.638                   | N/A                 |
| logP, HD, SASA, C18-AA           | 0.781 | 0.665 | 18.7 | 5.78  | - 8.34<br>± 2.0 | - 0.481 ±<br>0.075 | 0.584 ±<br>0.28                          | 0.0116 ±<br>0.0021<br>(Å <sup>-2</sup> ) | - 5.14 ±<br>1.2 | -0.699              | 0.225                    | 0.646 (Å <sup>-2</sup> ) | -0.460              |

<sup>a</sup>  $A$ ,  $B$ ,  $C$  and  $D$  represent the coefficient of the independent variables (molecular descriptors);  $K$  represents the coefficient of the intercept. **Set 1** includes all compounds that were substrates.

**Table S13.** Results from multivariable regression and AIC<sub>C</sub> analysis for the selected CSP-SAR models for log(K<sub>m</sub>/normV<sub>max</sub>) for **Set 2**.<sup>a</sup>

| CSP-SAR Models                           | $r^2$ | $Q^2$ | $F$  | $W_i$ | $K$             | $A$             | $B$                                         | $C$               | $D$             | Standardized<br>$A$ | Standardized<br>$B$              | Standardized<br>$C$ | Standardized<br>$D$ |
|------------------------------------------|-------|-------|------|-------|-----------------|-----------------|---------------------------------------------|-------------------|-----------------|---------------------|----------------------------------|---------------------|---------------------|
| HD, MR, BC-GS <sub>min</sub> , O7-AA-C18 | 0.745 | 0.611 | 13.9 | 8.66  | - 15.1<br>± 2.5 | 1.45 ±<br>0.25  | 0.420 ±<br>0.099<br>(m <sup>-3</sup> . mol) | - 4.92 ±<br>1.3   | 6.69 ±<br>1.8   | 0.693               | 0.527<br>(m <sup>-3</sup> . mol) | -0.732              | 0.730               |
| HD, SASA, logP, BC-GS <sub>min</sub>     | 0.720 | 0.577 | 12.2 | 2.78  | - 8.47<br>± 2.3 | 0.645 ±<br>0.30 | 0.00950 ±<br>0.0025<br>(Å <sup>-2</sup> )   | - 0.463<br>± 0.16 | - 3.42 ±<br>1.0 | 0.310               | 0.545 (Å <sup>-2</sup> )         | -0.410              | -0.509              |

<sup>a</sup>  $A$ ,  $B$ ,  $C$  and  $D$  represent the coefficient of the independent variables (molecular descriptors);  $K$  represents the coefficient of the intercept. **Set 2** includes all compounds that were substrates excluding 26 and 27.

**Table S14.** Results from multivariable regression and AIC<sub>C</sub> analysis for the selected CSP-SAR models for log(normV<sub>max</sub>/K<sub>m</sub>) for **Set 1.**<sup>a</sup>

| CSP-SAR Models                   | $r^2$ | $Q^2$ | $F$  | $W_i$ | $K$<br>( $\mu\text{M}$ ) | $A$ ( $\mu\text{M}$ ) | $B$                                                        | $C$                                                        | $D$                                    | Standardized<br>$A$ ( $\mu\text{M}$ ) | Standardized<br>$B$                      | Standardized<br>$C$                      | Standardized<br>$D$     |
|----------------------------------|-------|-------|------|-------|--------------------------|-----------------------|------------------------------------------------------------|------------------------------------------------------------|----------------------------------------|---------------------------------------|------------------------------------------|------------------------------------------|-------------------------|
| logP, SASA, O7-GS <sub>max</sub> | 0.757 | 0.632 | 22.9 | 7.10  | 12.1 $\pm$<br>2.1        | 0.361 $\pm$<br>0.078  | - 0.0164<br>$\pm$ 0.0025<br>( $\mu\text{M}/\text{\AA}^2$ ) | 4.54 $\pm$ 1.0<br>( $\mu\text{M}$ )                        | N/A                                    | 0.525                                 | -0.918<br>( $\mu\text{M}/\text{\AA}^2$ ) | 0.638 ( $\mu\text{M}$ )                  | N/A                     |
| logP, HD, SASA, C18-AA           | 0.781 | 0.666 | 18.7 | 5.77  | 8.34 $\pm$<br>2.0        | 0.482 $\pm$<br>0.075  | - 0.584 $\pm$<br>0.28<br>( $\mu\text{M}$ )                 | - 0.0116 $\pm$<br>0.0021<br>( $\mu\text{M}/\text{\AA}^2$ ) | 5.14<br>$\pm$ 1.2<br>( $\mu\text{M}$ ) | 0.699                                 | -0.224 ( $\mu\text{M}$ )                 | -0.646<br>( $\mu\text{M}/\text{\AA}^2$ ) | 0.459 ( $\mu\text{M}$ ) |

<sup>a</sup>  $A$ ,  $B$ ,  $C$  and  $D$  represent the coefficient of the independent variables (molecular descriptors);  $K$  represents the coefficient of the intercept. Set 1 includes all compounds that were substrates.

**Table S15.** Results from multivariable regression and AIC<sub>C</sub> analysis for the selected CSP-SAR models for log(normV<sub>max</sub>/K<sub>m</sub>) for **Set 2.**<sup>a</sup>

| CSP-SAR Models                           | $r^2$ | $Q^2$ | $F$  | $W_i$ | $K$<br>( $\mu\text{M}$ ) | $A$ ( $\mu\text{M}$ ) | $B$                                                               | $C$ ( $\mu\text{M}$ ) | $D$ ( $\mu\text{M}$ ) | Standardized<br>$A$ ( $\mu\text{M}$ ) | Standardized<br>$B$ | Standardized<br>$C$ ( $\mu\text{M}$ ) | Standardized<br>$D$ ( $\mu\text{M}$ ) |
|------------------------------------------|-------|-------|------|-------|--------------------------|-----------------------|-------------------------------------------------------------------|-----------------------|-----------------------|---------------------------------------|---------------------|---------------------------------------|---------------------------------------|
| HD, MR, BC-GS <sub>min</sub> , O7-AA-C18 | 0.745 | 0.611 | 13.9 | 8.66  | 15.1 $\pm$<br>2.5        | - 1.45 $\pm$<br>0.25  | - 0.420 $\pm$<br>0.099<br>( $\mu\text{M}/\text{m}^3/\text{mol}$ ) | 4.92 $\pm$<br>1.3     | - 6.69 $\pm$<br>1.8   | -0.693                                | -0.527              | 0.732                                 | -0.730                                |
| HD, SASA, logP, BC-GS <sub>min</sub>     | 0.720 | 0.577 | 12.2 | 2.78  | 8.47 $\pm$<br>2.3        | - 0.645<br>$\pm$ 0.30 | - 0.00950 $\pm$<br>0.0025<br>( $\mu\text{M}/\text{\AA}^2$ )       | 0.463 $\pm$<br>0.16   | 3.42 $\pm$<br>1.0     | -0.310                                | -0.545              | 0.410                                 | 0.509                                 |

<sup>a</sup>  $A$ ,  $B$ ,  $C$  and  $D$  represent the coefficient of the independent variables (molecular descriptors);  $K$  represents the coefficient of the intercept. Set 2 includes all compounds that were substrates excluding 26 and 27.

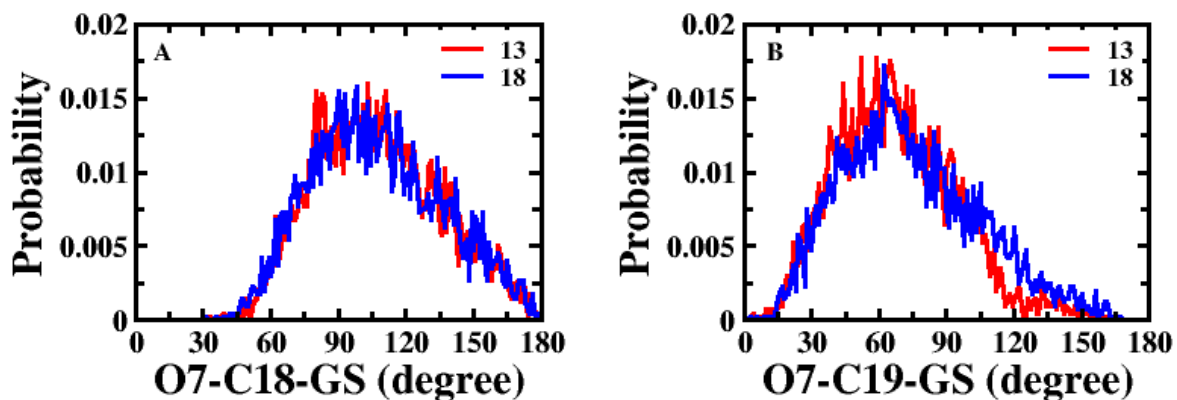

**Figure S1.** Probability distributions of structural descriptors. (A) Angle O7-C18-GS and (B) angle O7-C19-GS displayed the highest and second highest correlations with  $K_m$  for **Set 2** amongst the structural descriptors. Compounds **13** and **18** were the most and least potent substrates in **Set 2**, respectively.

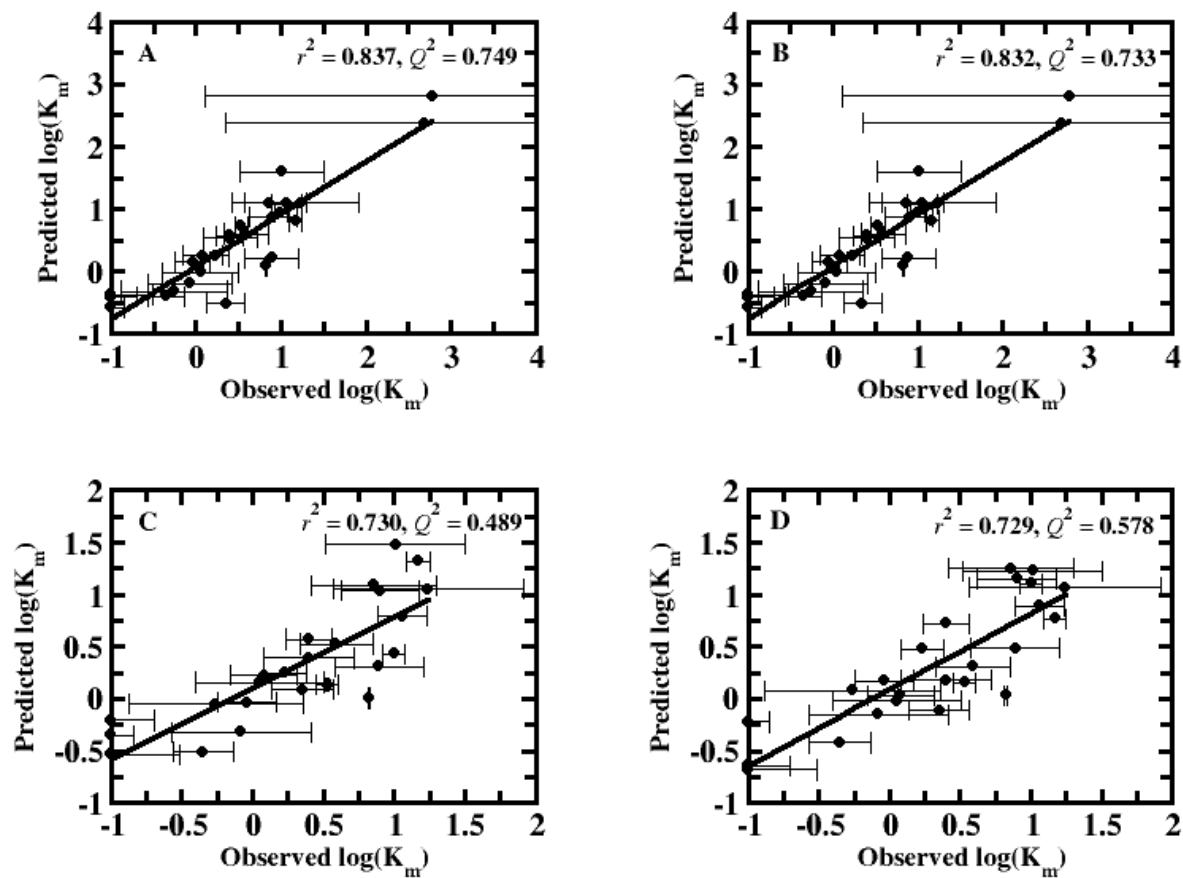

**Figure S2.** Regression plots of predicted vs. observed  $\log(K_m)$  values for anilinyll conjugates of glu-CDCA using CSP-SAR models. (A) and (B) represent the best and the second best models for **Set 1**, while (C) and (D) represent the best and the second best models for **Set 2**.



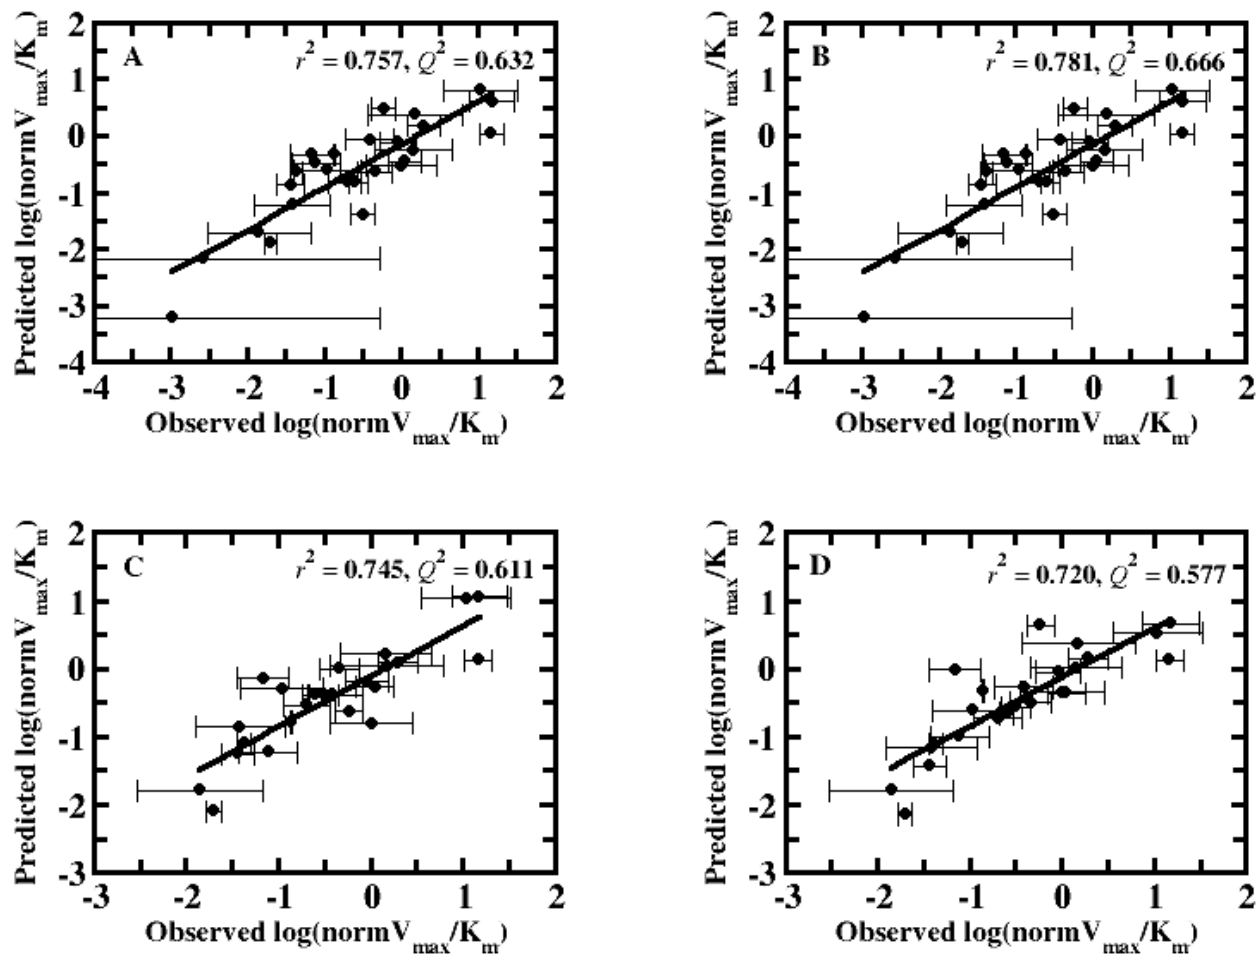

**Figure S3.** Regression plots of predicted vs. observed  $\log(\text{norm}V_{\text{max}}/K_m)$  values for aniliny conjugates of glu-CDCA using CSP-SAR models. (A) and (B) represent the best and the second best models for **Set 1**, while (C) and (D) represent the best and the second best models for **Set 2**.
